# Supplementary material
Source: PubMed Central journal article supplement (PMC8631742)
Supplement: NIHMS1735412-supplement-1.pdf [file NIHMS1735412-supplement-1.pdf]

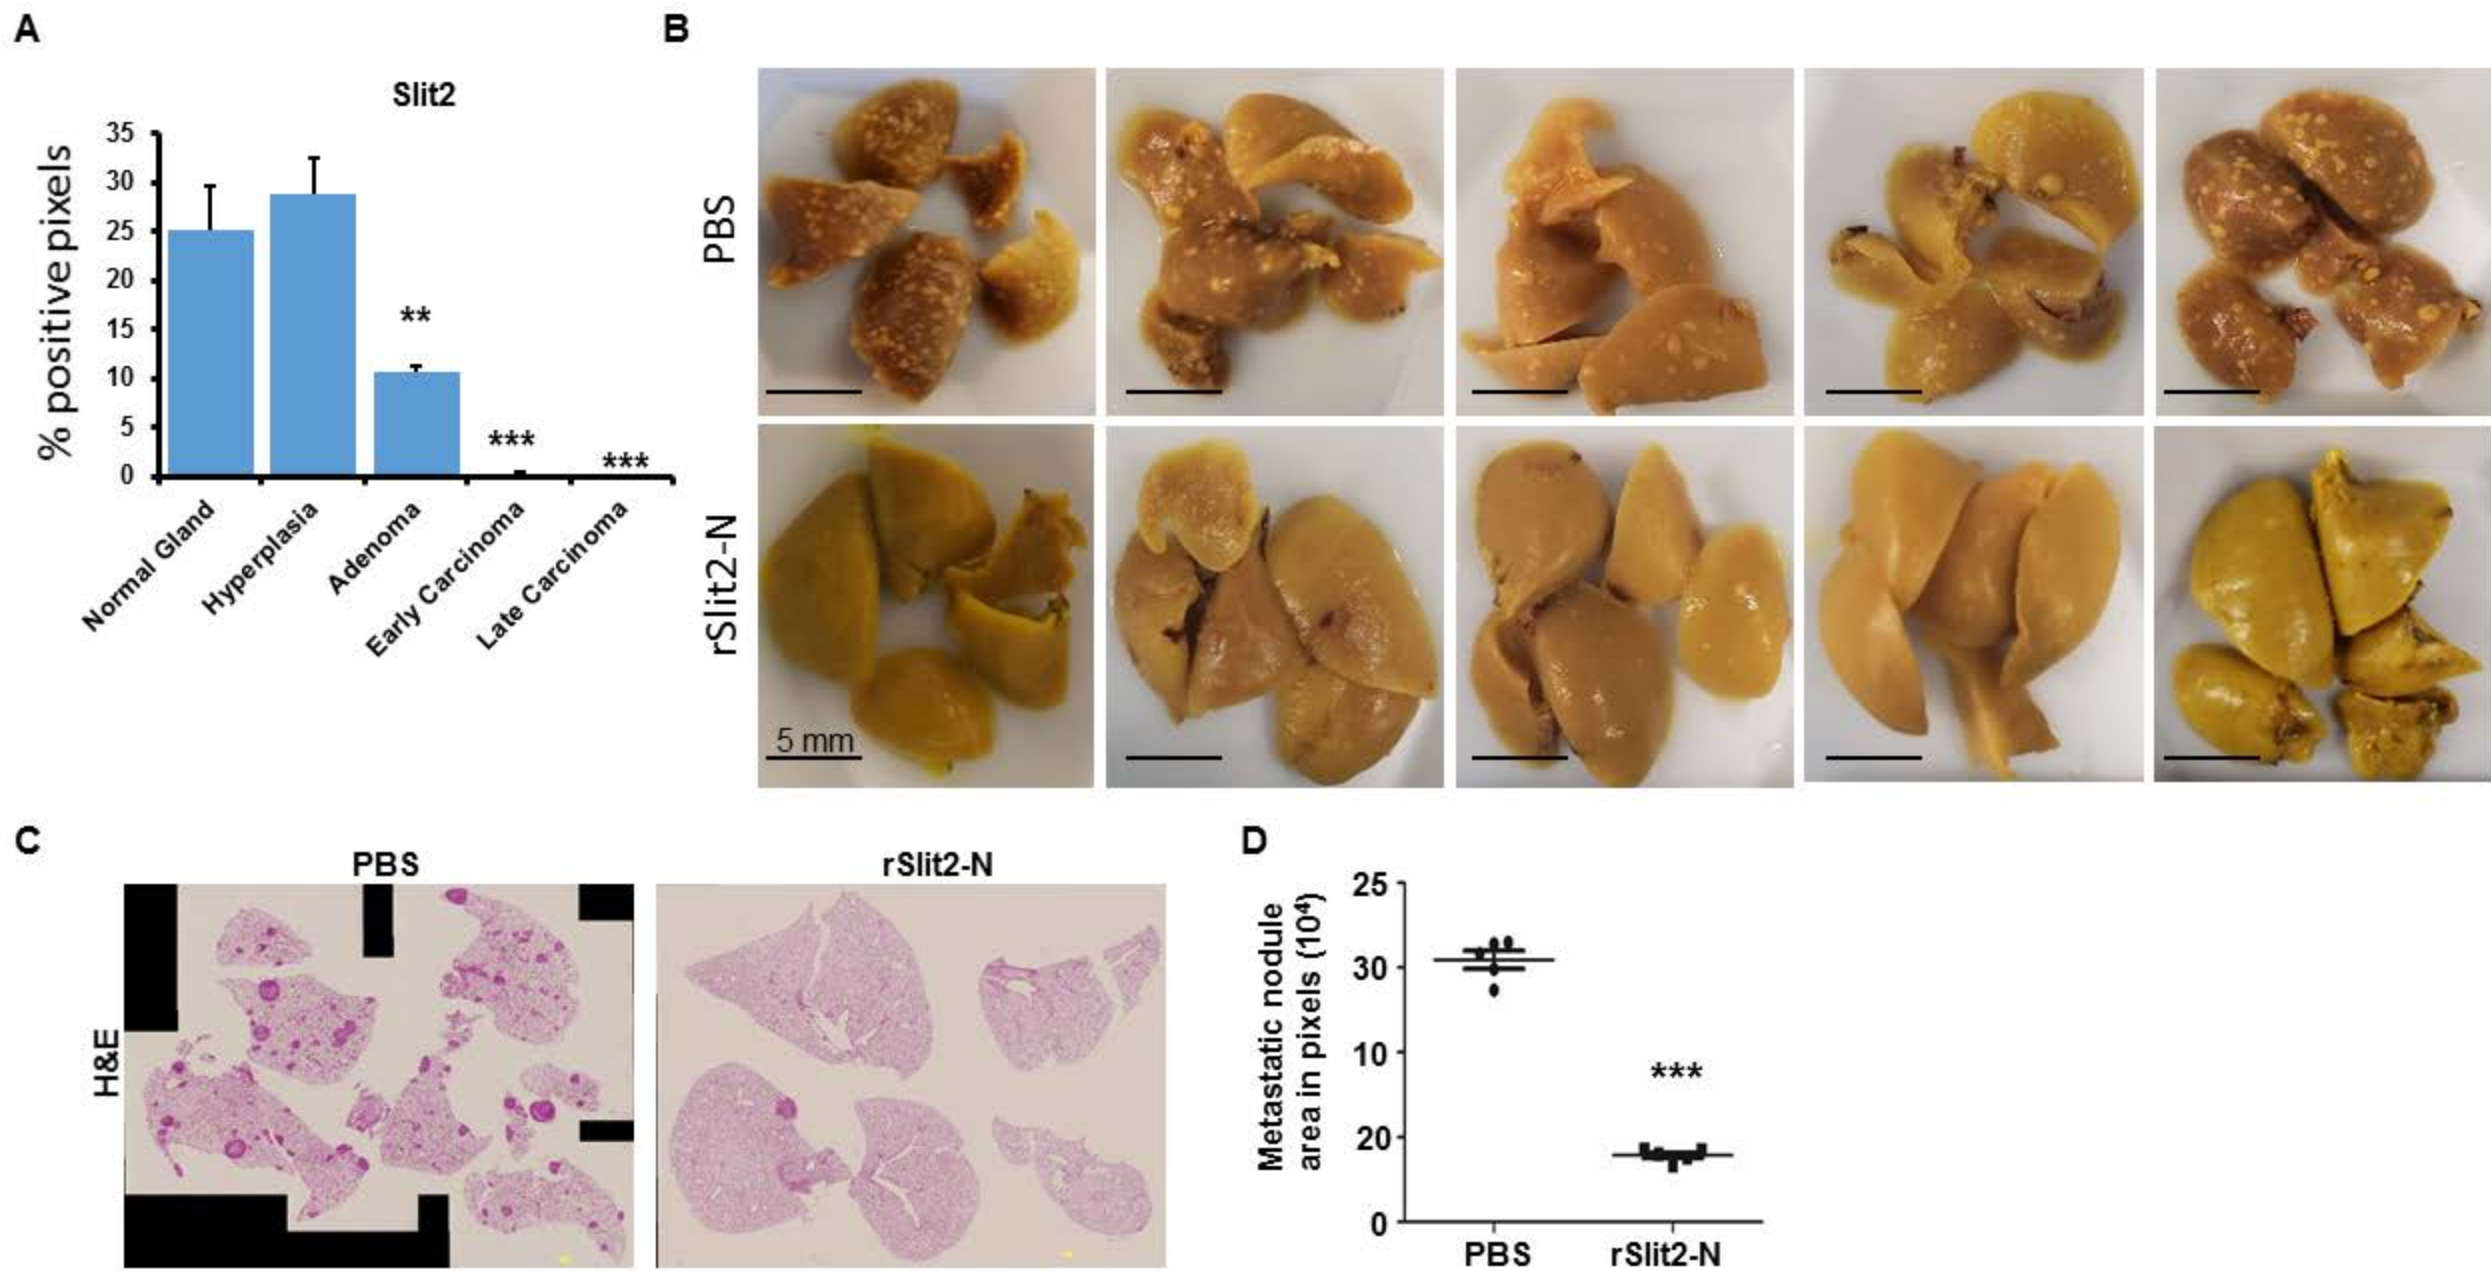

**Fig. S1. rSlit2-N treatment inhibits lung metastases in MMTV-PyMT spontaneous mammary tumor model.**

**(A)** Quantification of Slit2 expression in mammary glands harvested from MMTV-PyMT mice at different stages of tumor progression.

**(B)** Images of the lungs harvested from rSlit2 or PBS treated MMTV-PyMT mice.

**C-D** The lungs were processed and H&E stained. The slides were imaged under a light microscope and images were analyzed for the area of metastases using ImageJ software. **(C)** Representative H&E image of the lungs harvested from MMTV-PyMT tumors. **(D)** Quantification of metastases area in the lungs derived from (C).

\*\* is  $p < 0.01$ ; \*\*\* is  $p < 0.001$  using Student's t-test.

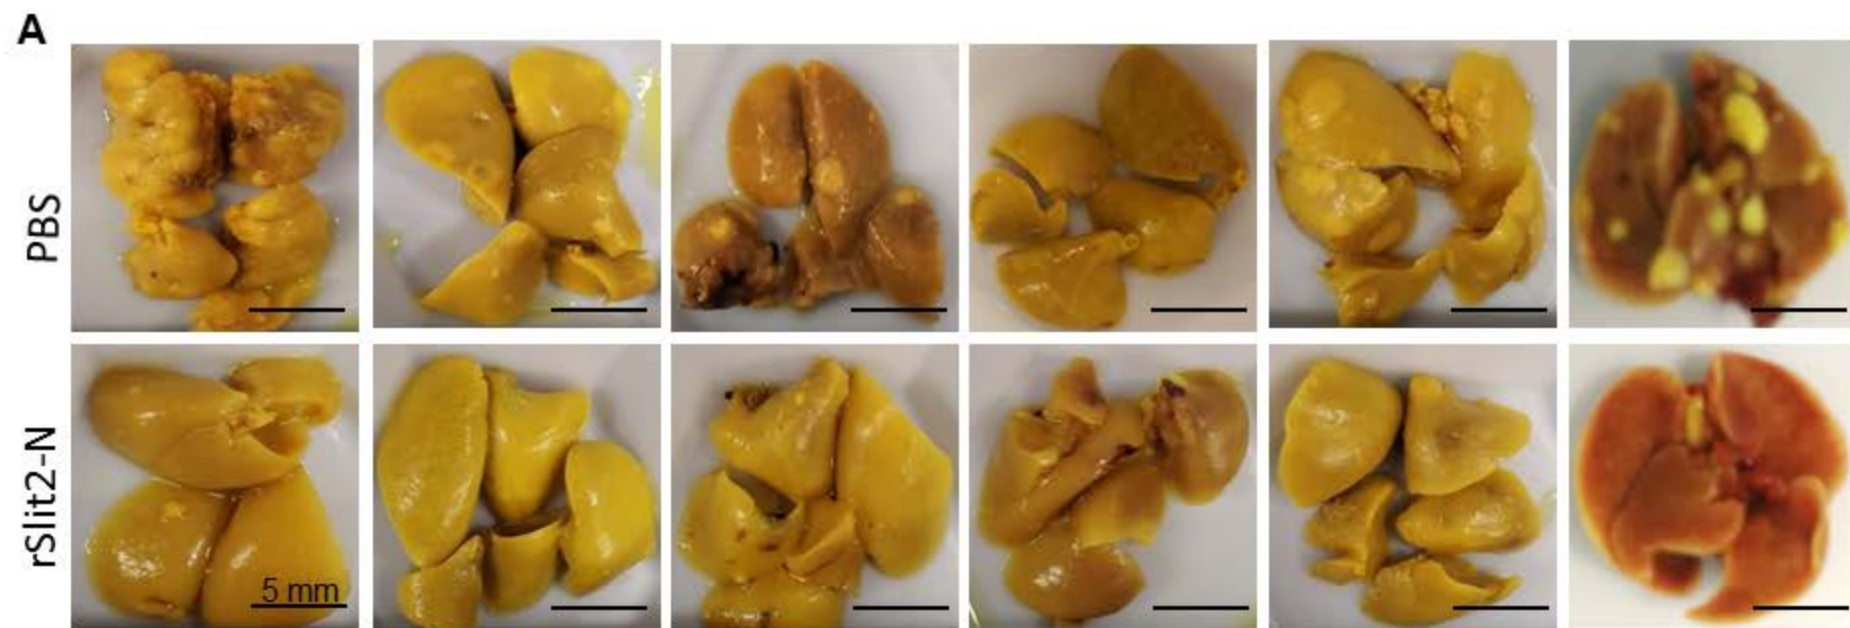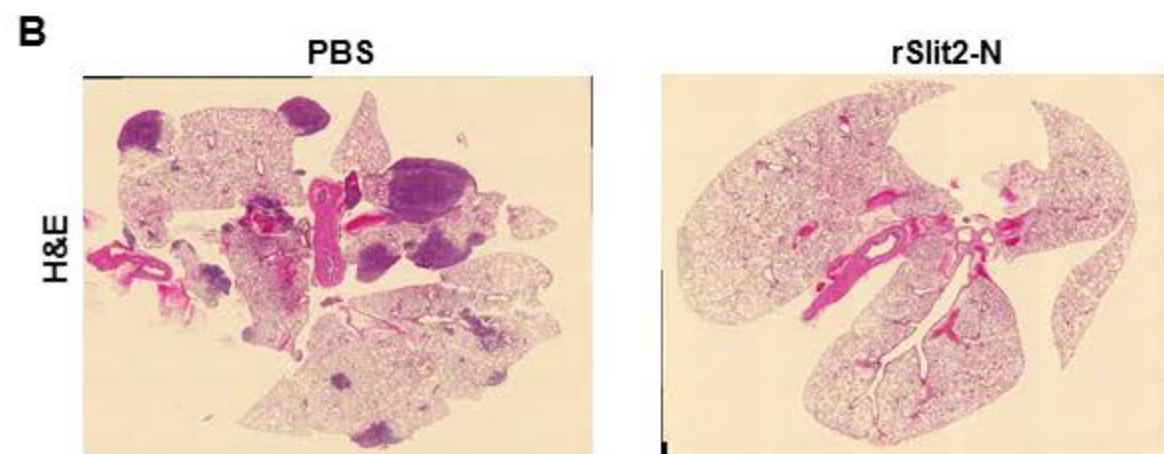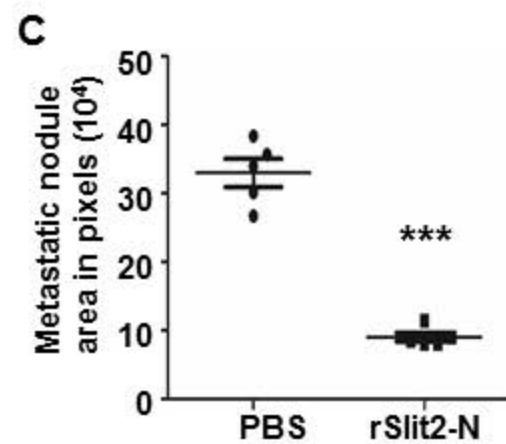

**Fig. S2. rSlit2-N treatment inhibits orthotopic syngeneic tumor metastases.**

The MVT1 orthotopic syngeneic tumors bearing mice were treated with rSlit2-N or PBS. The mice were euthanized and lungs were harvested, processed, and H&E stained. The slides were imaged under a light microscope and images were analyzed for the area of metastases using ImageJ software.

(A) Images of the lungs harvested.

(B) Representative H&E image of the lungs harvested from MMTV-PyMT tumors.

(C) Quantification of metastases area in the lungs.

\*\*\* is  $p < 0.001$  using Student's t-test.



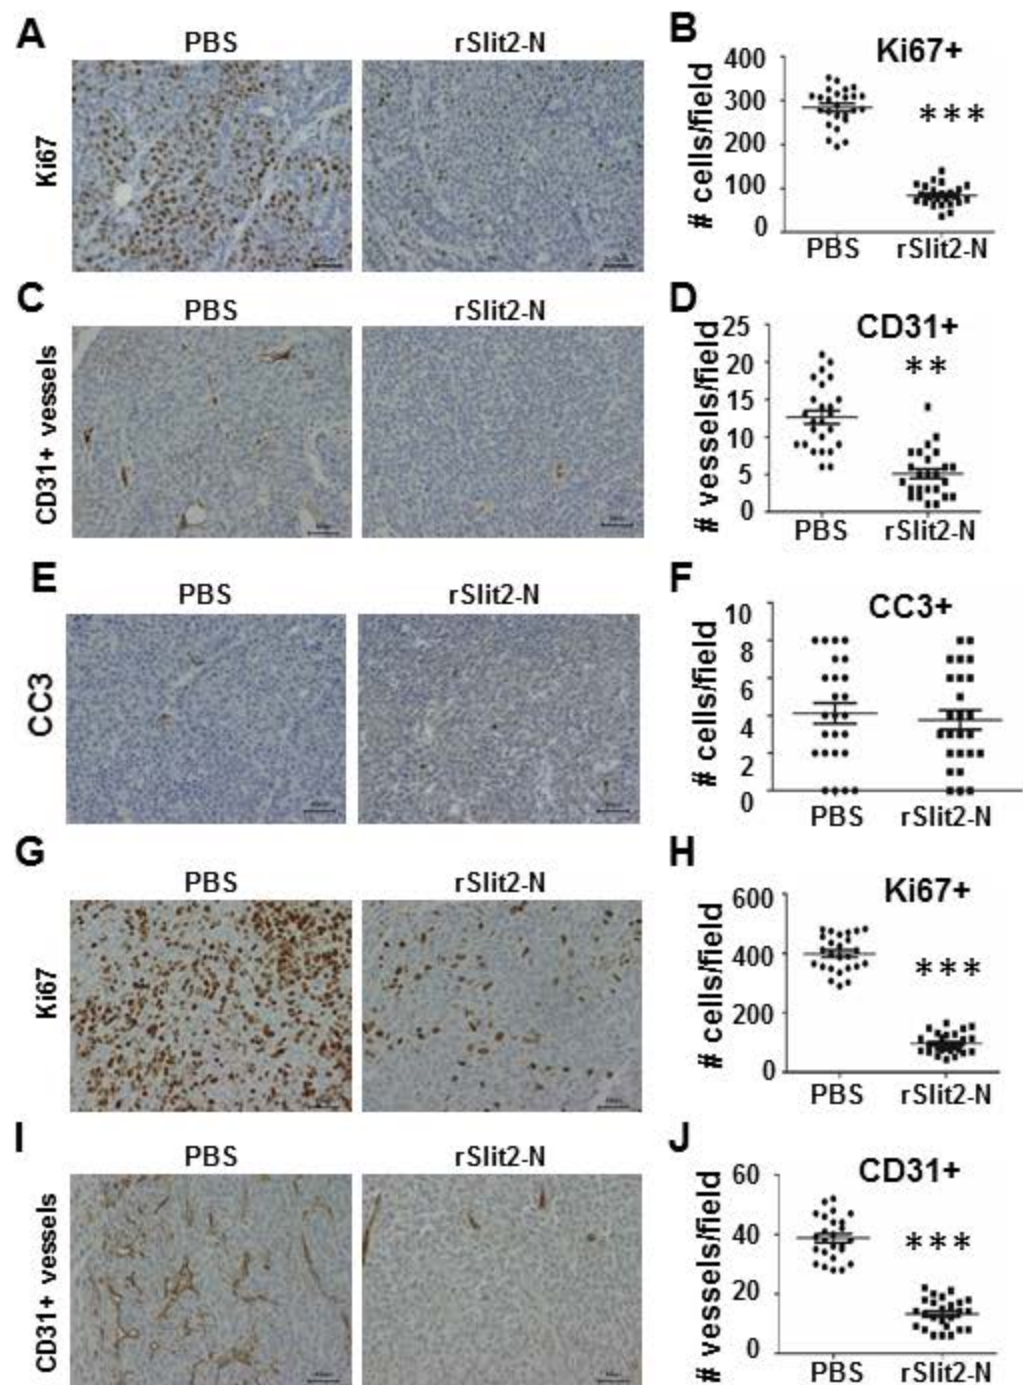

**Fig. S3. Slit2 inhibits markers of tumor growth.**

**A-F.** The tumors harvested from 12 weeks old MMTV-PyMT mice treated with rSlit2-N or PBS were processed and immunostained with different antibodies. Representative images of tumor sections immunostained with **(A)** Ki67, **(C)** CD31 antibodies, and **(E)** cleaved caspase 3 (CC3) antibody. Quantification of **(B)** Ki67+ cells per field, **(D)** the total number of CD31+ vessels, and **(F)** CC3+ apoptotic cells in the tumor sections.

**G-J.** The MVT1 tumors harvested from mice treated with rSlit2 or PBS were processed and immunostained with different antibodies. Representative images of tumor sections immunostained with **(G)** Ki67 and **(I)** CD31 antibodies. Quantification of **(H)** Ki67+ cells per field and **(J)** total number of CD31+ vessels per field respectively.

N= 5 each group, 5 sections from each tumor. \*\* is  $p < 0.01$ ; \*\*\* is  $p < 0.001$  using Student's t-test.

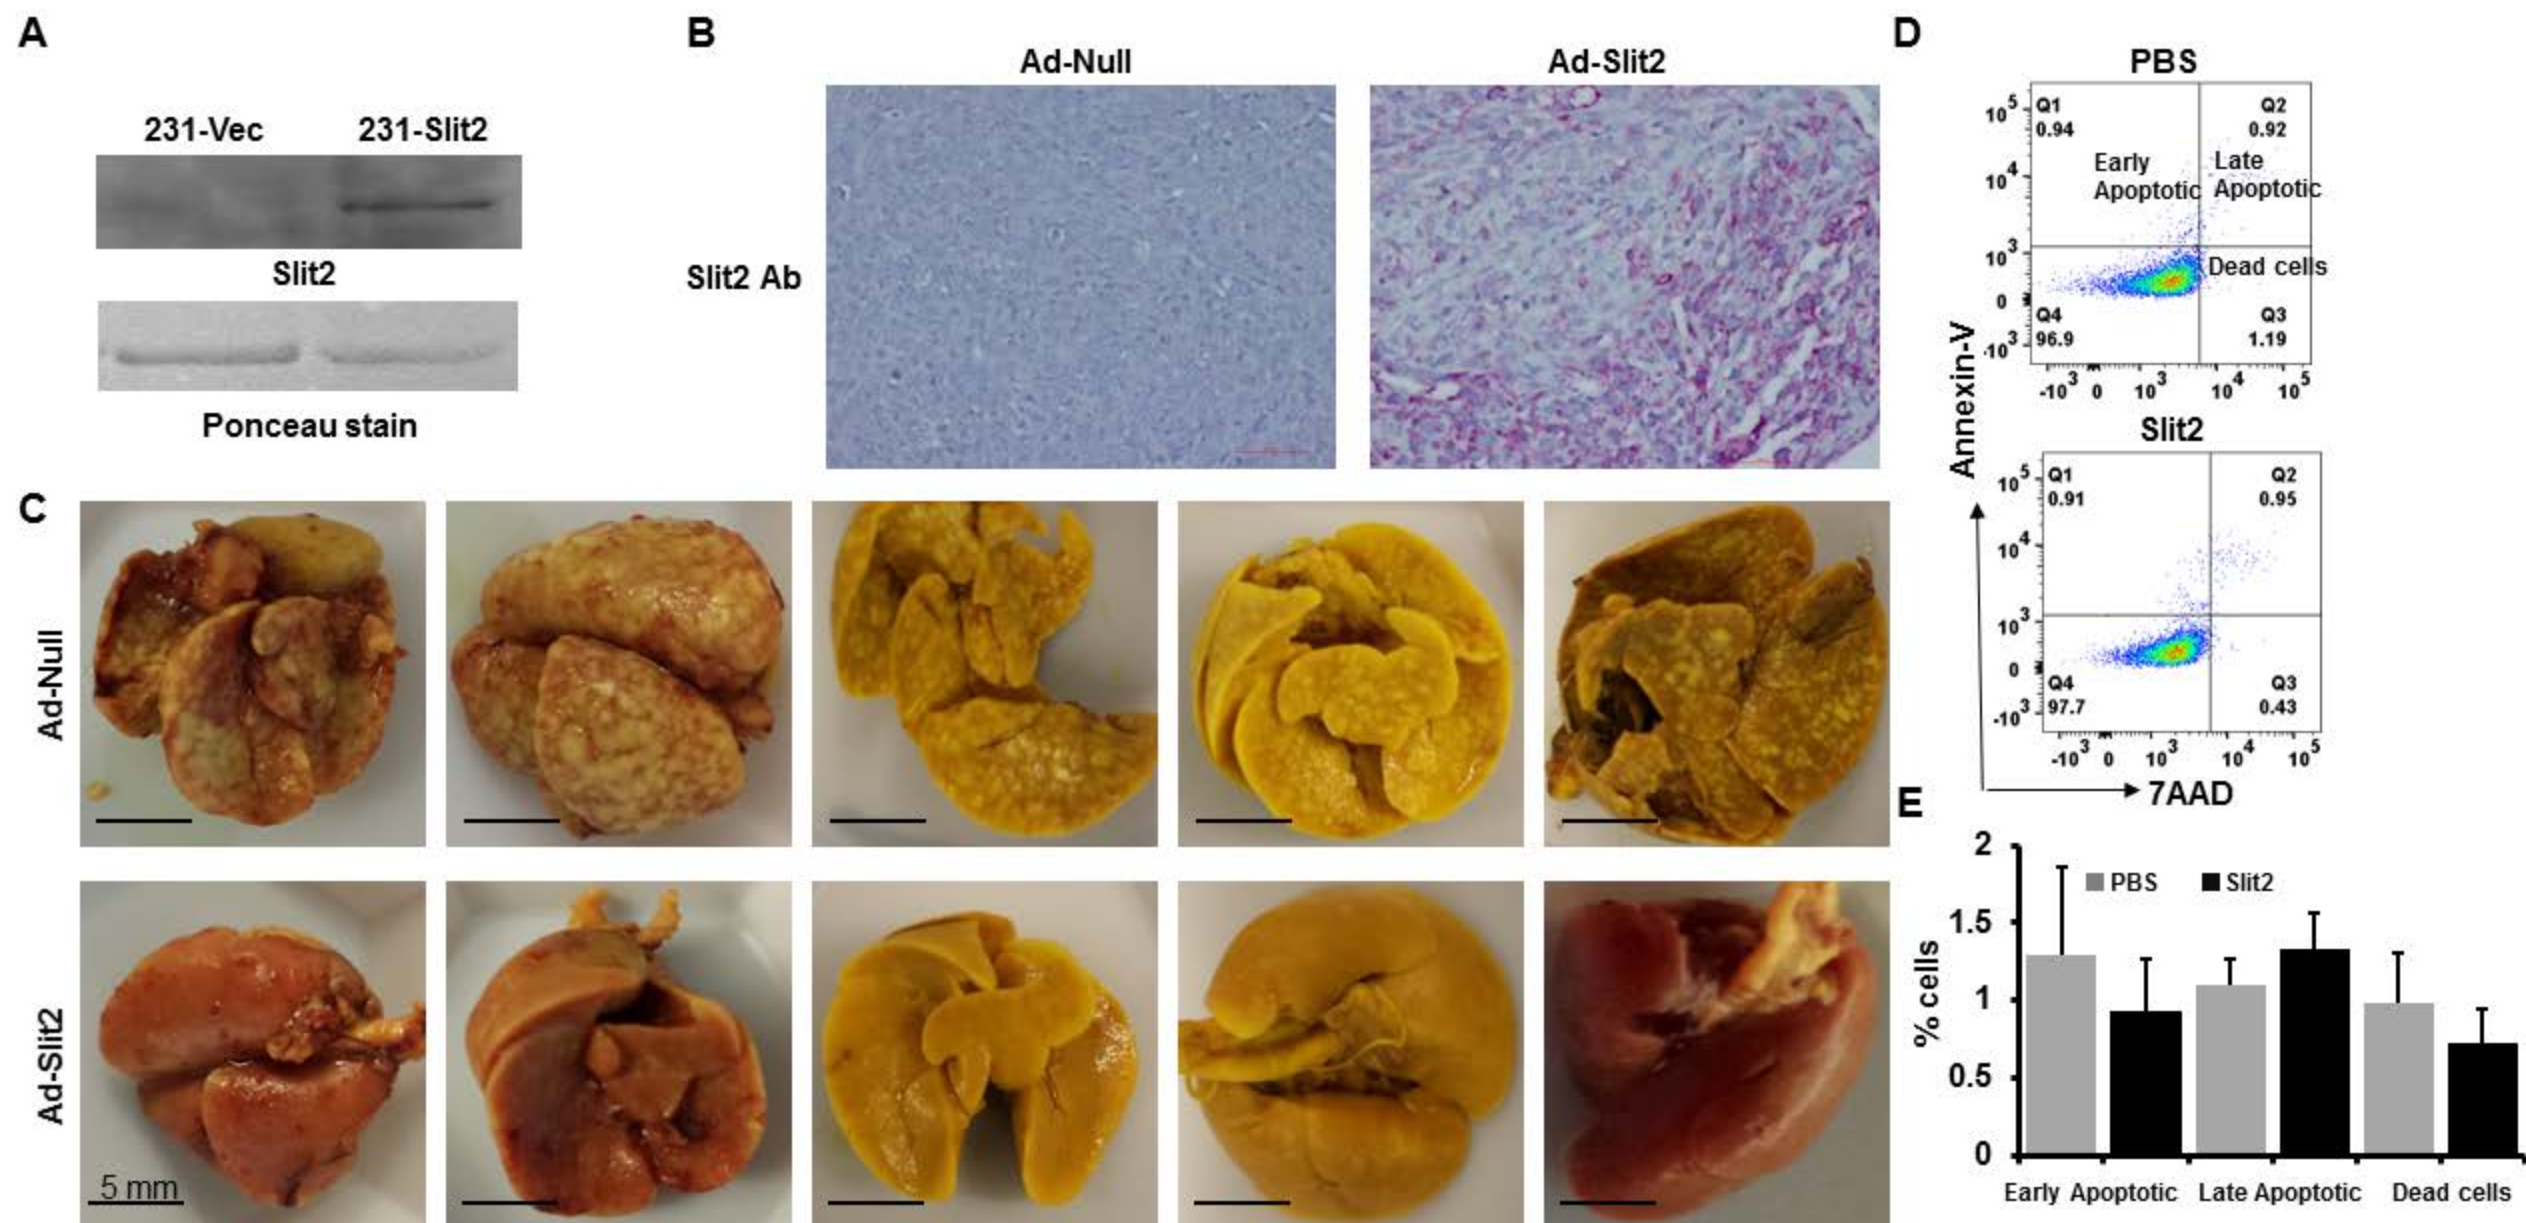

**Fig. S4. Slit2 inhibits breast cancer metastases to the lungs in the xenograft mouse model.**

(A) Conditioned media derived from MDA-MB-231 cells overexpressing Slit2 (231-Slit2) or vector control (231-Vec) cells were subjected to western blot analysis using anti-human Slit2 antibody. Ponceau stain was used to identify equal sample loading.

(B) The Ad-Null or Ad-Slit2 treated MDA-MB-231 xenograft tumors were immunostained with Slit2 antibody. The images showing efficient transduction of tumor tissue as evident by increased expression of Slit2 throughout the tumor, including the tumor core.

(C) Images of lungs harvested from MDA-MB-231 xenograft bearing animals treated with Ad-Null or Ad-Slit2.

D-E. MDA-MB-231 cells were treated with rSlit2-N or PBS for 24 hours and analyzed for Annexin-V positive early apoptotic or 7AAD positive dead cells or Annexin-V and 7AAD double positive late apoptotic cells by flow cytometry. (D) Flow cytometry plots showing detection of early apoptotic, late apoptotic and dead cells. (E) Quantification of apoptotic and dead cells. No statistically significant differences were observed between any of the groups.



A

7 molecule(s) associated with Osteoarthritis Pathway at set\_1\_ipa\_trt-vs-ctrl - 2020-02-10 05:32 PM [Ratio: 7/211 (0.033)] [z-score: 2.449] [p-value: 5.05E-03] [VIEW REPORT](#) [OPEN PATHWAY](#)

[ADD TO MY PATHWAY](#) [ADD TO MY LIST](#) [CREATE DATASET](#) [CUSTOMIZE TABLE](#) [Expand](#)

| Symbol  | Entrez Gene Name               | Identifier           | Measurement    | Add/Remove column(s) | Expected | Location            | Type(s)                 | Biomarker Applicatio...       | Drug(s)                     |
|---------|--------------------------------|----------------------|----------------|----------------------|----------|---------------------|-------------------------|-------------------------------|-----------------------------|
|         |                                | Ensembl/Gene Symb... | Expr Log Ratio | Expr p-value         |          |                     |                         |                               |                             |
| BGLAP*  | bone gamma-carboxyglu...       | ENSMUSG00000074483   | ↑3.116         | 4.64E-03             | ↑ Up     | Extracellular Space | other                   | diagnosis, efficacy, ...all 3 | gallium nitrate ...all 1    |
| CNMD    | chondromodulin                 | ENSMUSG00000022025   | ↓-2.029        | 4.13E-05             | ↓ Down   | Extracellular Space | other                   |                               |                             |
| COL2A1  | collagen type II alpha 1 ch... | ENSMUSG00000022483   | ↑3.084         | 5.72E-06             | ↑ Up     | Extracellular Space | other                   | efficacy ...all 1             | collagenase clostri...all 1 |
| CREB3L4 | cAMP responsive element...     | ENSMUSG00000027938   | ↓-4.186        | 1.11E-03             | ↓ Down   | Nucleus             | transcription regulator |                               |                             |
| GDF5    | growth differentiation fact... | ENSMUSG00000038259   | ↓-2.018        | 5.27E-03             | ↓ Down   | Extracellular Space | growth factor           |                               |                             |
| MMP10   | matrix metalloproteinase 1...  | ENSMUSG00000047562   | ↑3.200         | 1.16E-03             | ↑ Up     | Extracellular Space | peptidase               |                               | marimastat ...all 1         |
| MMP13   | matrix metalloproteinase 1...  | ENSMUSG00000050578   | ↑2.098         | 4.14E-05             | ↑ Up     | Extracellular Space | peptidase               | diagnosis ...all 1            | marimastat, prino...all 2   |

Selected/Total molecules: 0 / 7

B

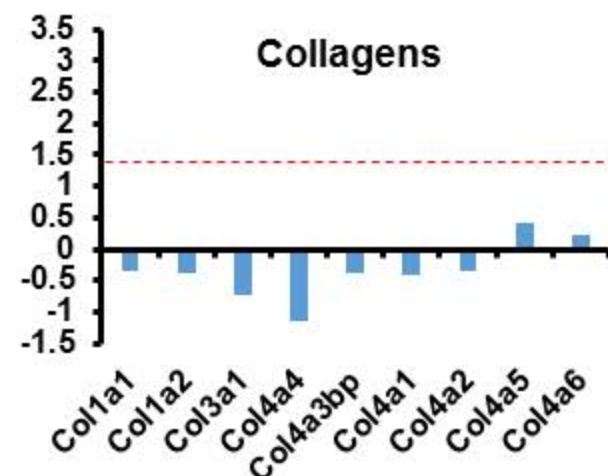

C

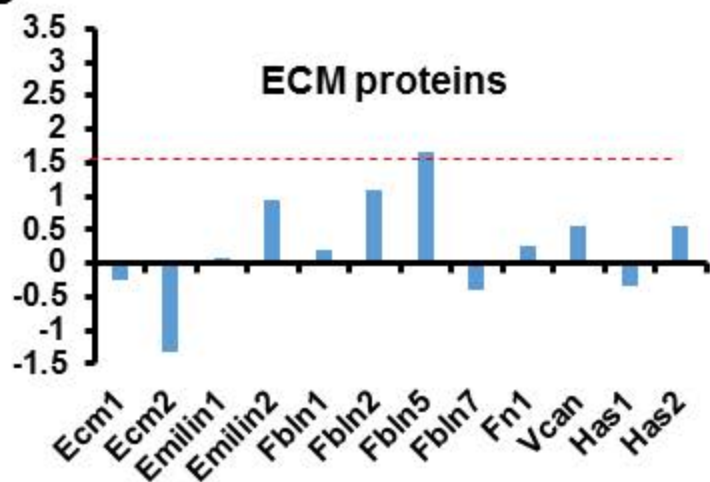

D

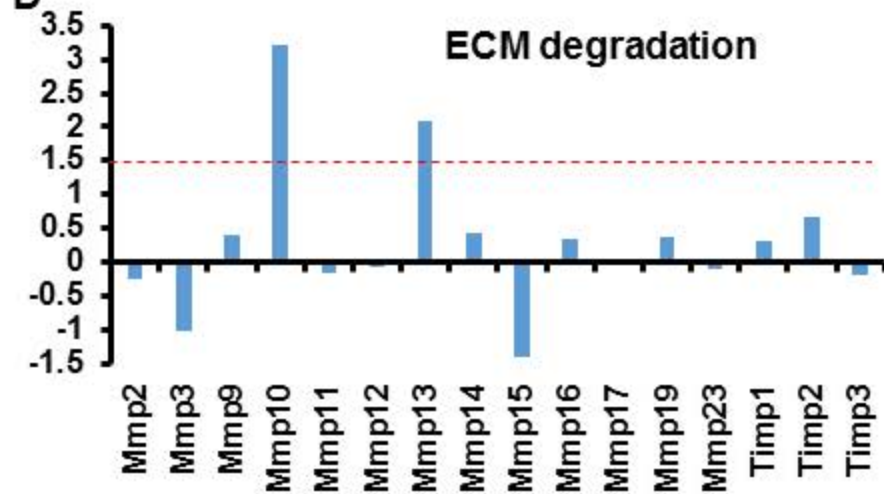

E

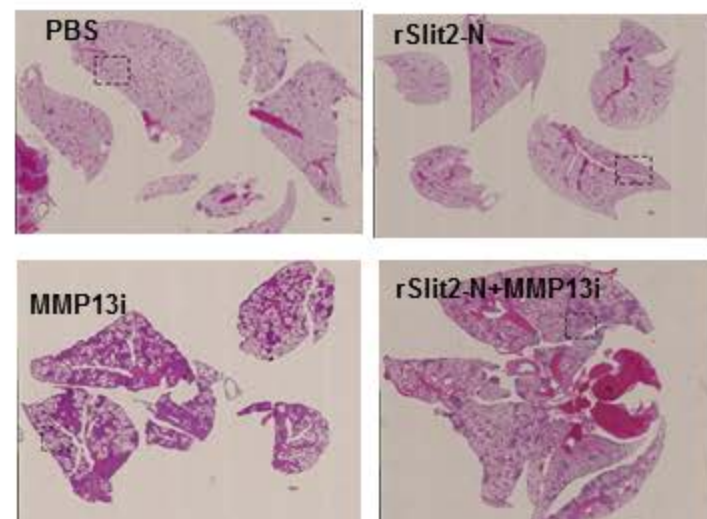

**Fig. S5. rSlit2-N treatment alters the expression of ECM degradation related genes.**

The tumors isolated from MMTV-PyMT mice treated with rSlit2-N or PBS were lysed and total RNA was sequenced for gene expression levels.

(A) The table shows the differentially expressed genes and statistical parameters linked to the osteoarthritis pathway identified in Fig. 1A.

**B-D.** Detailed analysis of ECM related genes was performed on RNASeq data from (A).

(B) Expression of different types of collagen genes.

(C) Expression of other ECM protein genes.

(D) Expression of ECM degradation related genes.

(E) Representative images of lungs harvested from MDA-MB-231 xenograft bearing animals treated with rSlit2-N or PBS in the presence or absence of MMP13 inhibitor (MMP13i).



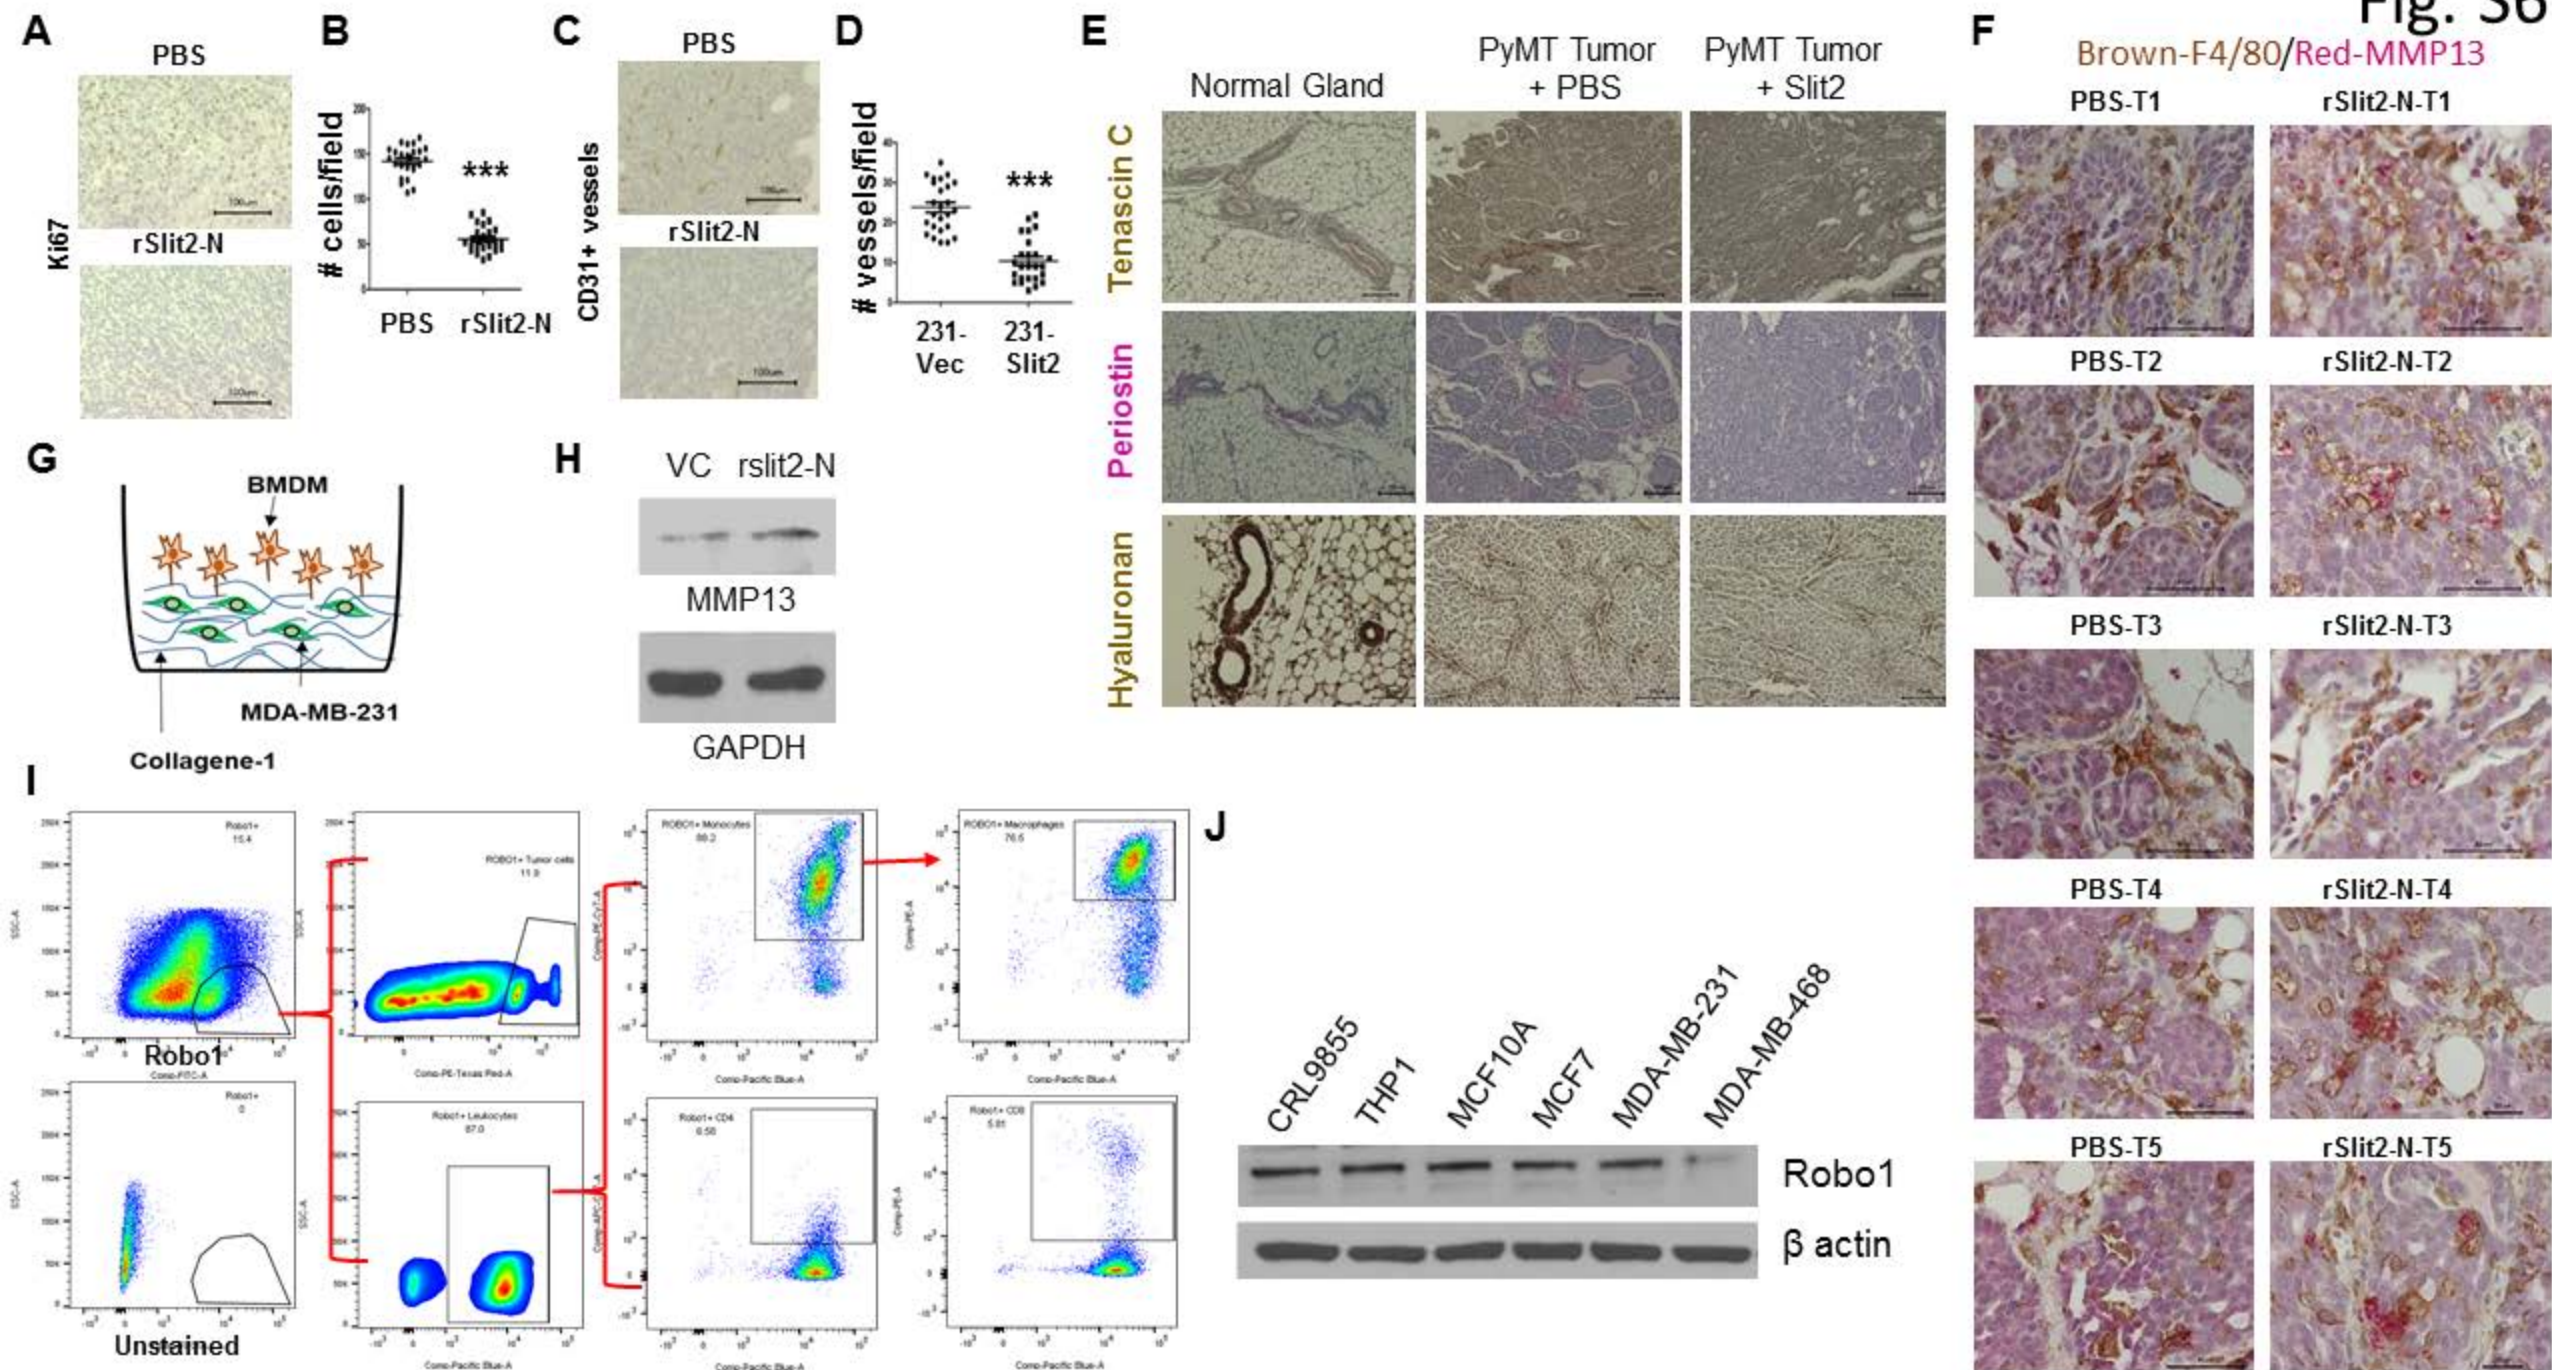

**Fig. S6. Analysis of TAMs-specific expression of MMP13 and Robo1 receptor.**

**A-D.** The MDA-MB-231 xenografts treated with PBS or rSlit2-N were analyzed for proliferation and angiogenesis by IHC method. **(B)** Representative images showing detection of Ki67+ proliferative cells. **(C)** Quantification of Ki67+ cells detected in **(B)**. **(D)** Representative images showing detection of CD31+ blood vessels. **(E)** Quantification of CD31+ blood vessels detected in **(D)**. N= 5 each group, 5 sections from each tumor.

**(E)** The tumors harvested from 12 weeks old MMTV-PyMT mice treated with rSlit2-N or PBS or mammary glands from age matched wild type mice were processed and immunostained with different antibodies. Representative images of tumor sections immunostained with Tenascin C, Periostin, and Hyaluronan antibodies.

**(F)** The tumors harvested from PBS or rSlit2-N treated MMTV-PyMT mice were processed and sections were immunostained with F4/80 and MMP13 antibodies. The primary antibodies were detected using peroxidase-DAB and alkaline phosphatase-Red chromogen substrate systems respectively. The representative images from 5 different tumors of each group are presented here.

**(G)** Diagram depicting a setup for macrophage and tumor cell co-culture in the collagen matrix.

**(H)** BMDMs were treated with rSlit2-N or PBS. Cell lysates were analyzed for cleaved form of MMP13 expression by WB. GAPDH was used as a loading control.

**(I)** The MMTV-PyMT tumors were digested and filtered to generate the single-cell suspension. The cells were stained with Robo1 and different antibodies specific for stromal cell markers. The percentages of different types of Robo1+ cells present in the TME were identified using flow cytometry. A high percentage of Robo1-positive cells are CD45-positive lymphocytes (~87%) and about 12% of Robo1-positive cells are EpCam+ tumor cells. Further classification of Robo1+/CD45+ lymphocytes showed that 6.58% of cells are CD4-T cells, 5.81% cells are CD8-T cells and 88% cells are CD11b+ monocytes. Majority of Robo1+CD45+CD11b+ monocytes are F4/80+ macrophages (76.5%). Epcam-/CD45- stromal cells did not express Robo1.

\*\*\* is  $p < 0.001$  using student's t-test.

**(J)** Cell lysates from human normal breast cell line (MCF10A) and human breast cancer cell lines (MCF7, MDA-MB-231, and MDA-MB-468) and PMA-induced human THP1 and CRL9855 macrophages were analyzed for the expression of Robo1 using western blot method.  $\beta$  actin was used as loading control.



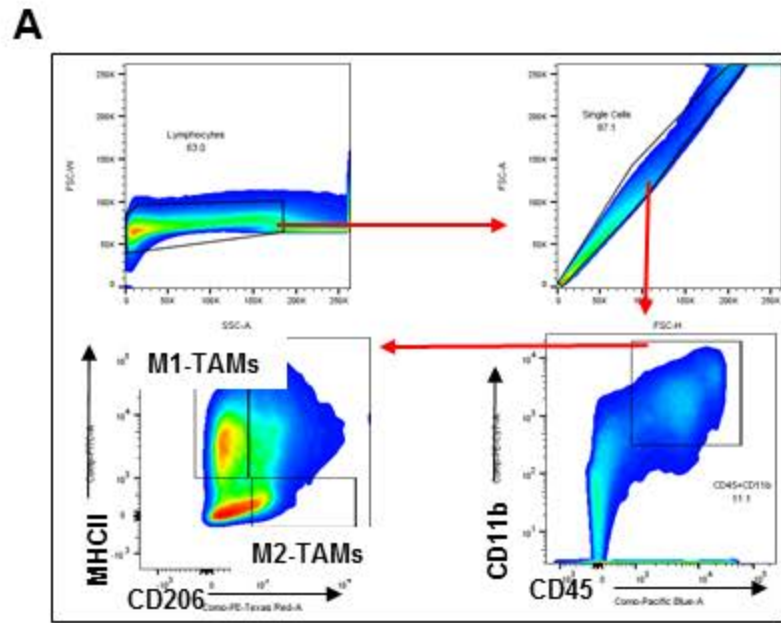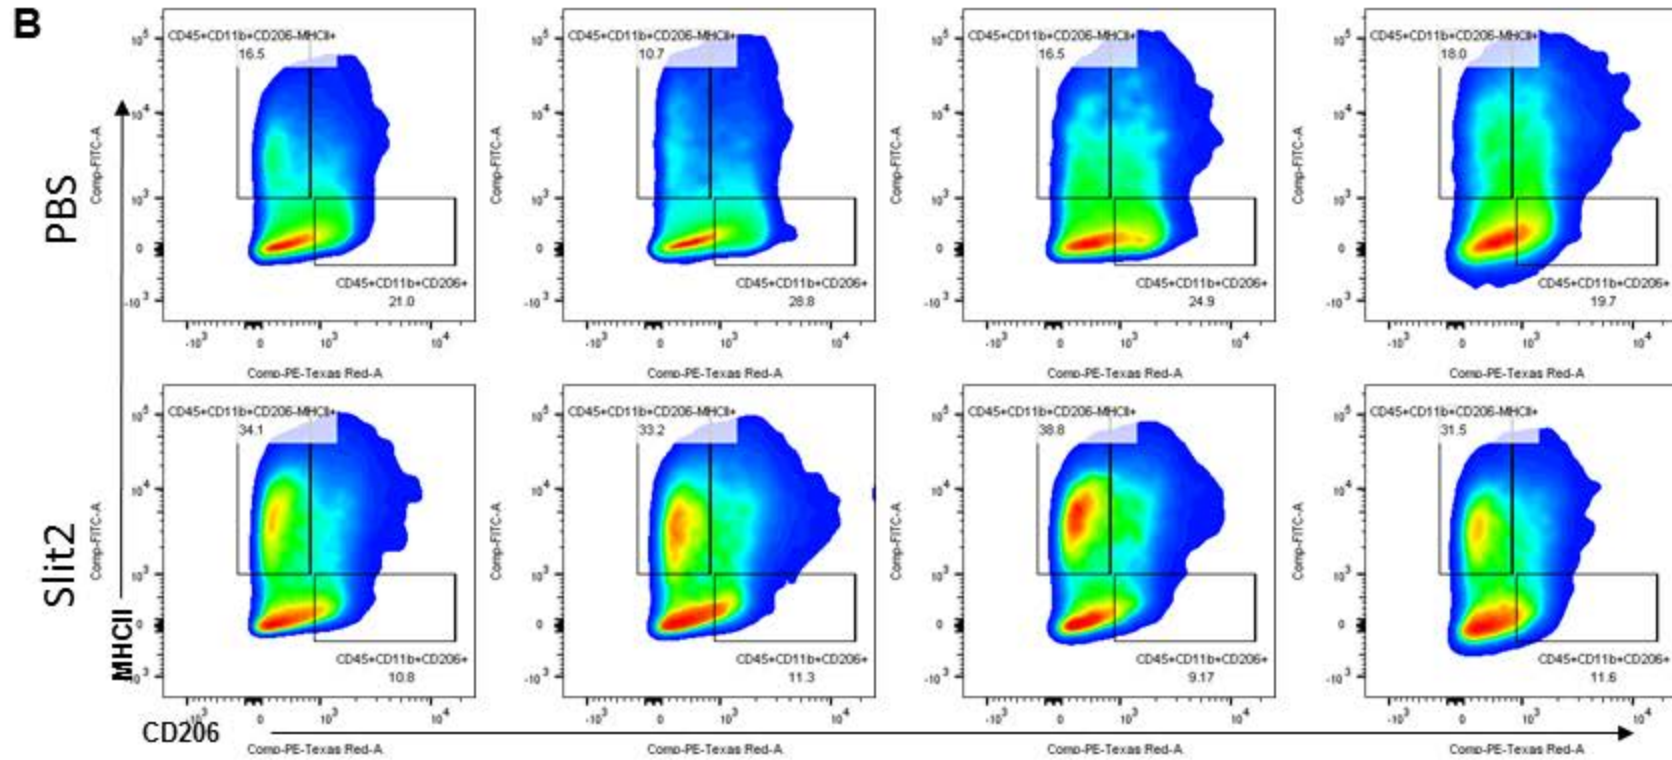

**Fig. S7. Analysis of macrophage polarization in MMTV-PyMT tumors.**

The whole tumors harvested from MMTV-PyMT mice treated with rSlit2-N or PBS were processed into single cells and flow cytometry was performed.

**(A)** Adopted gating strategy to identify M2-TAMs and M1-TAMs.

**(B)** Representative flow cytometry graphs depicting the percentage of M2-TAMs and M1-TAMs in different MMTV-PyMT tumors treated with rSlit2-N or PBS.

Fig. S8

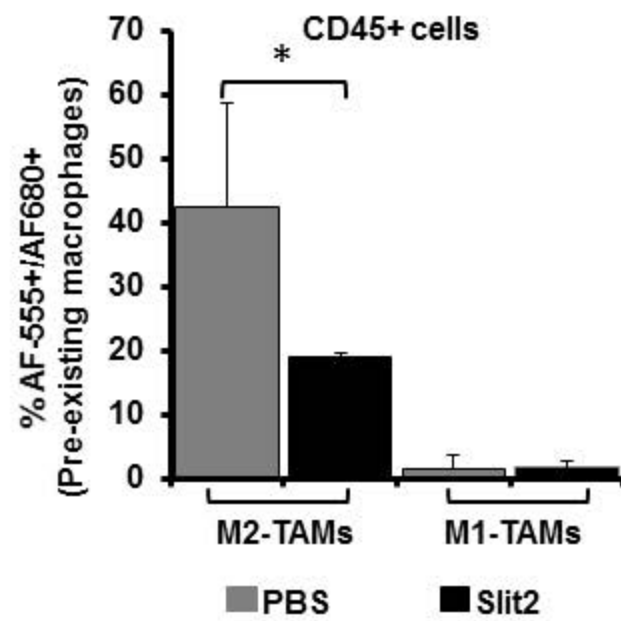

**Fig. S8. rSlit2-N enhance the differentiation of tumor-derived lymphocytes into M1 type macrophages.**

The flow cytometry analysis on tumor cell suspension from Fig. 3E was extended to identify M2-TAMs and M1-TAMs sub-population in pre-existing macrophages. \* is  $p < 0.05$  using the student's t-test.



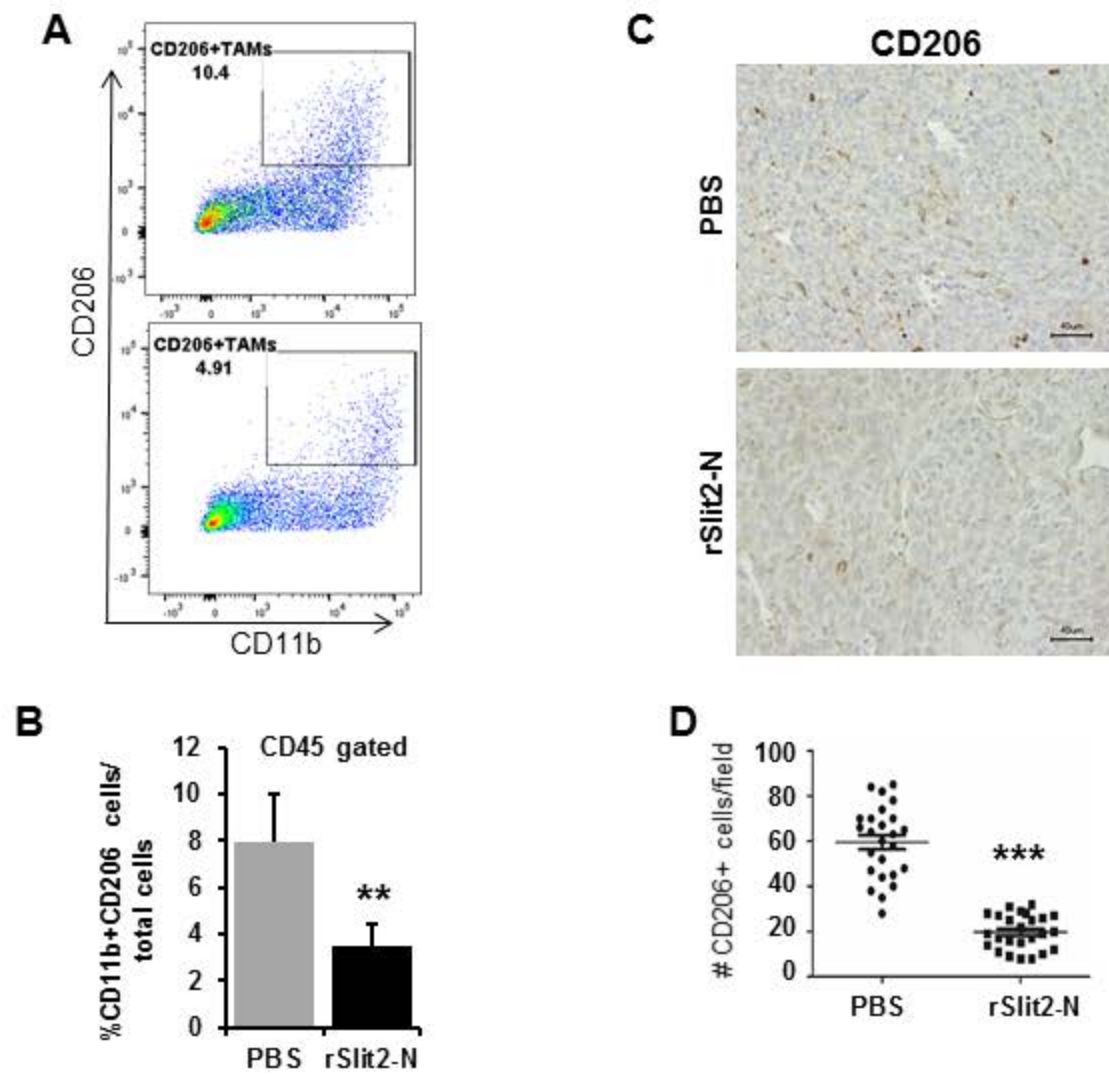

**Fig. S9. rSlit2-N inhibits CD206+ TAMs in MVT1 tumors.**

**A-B.** rSlit2-N or PBS treated MVT1 tumors were digested and filtered to the single-cell suspension. The cells were analyzed for different populations of CD206+ TAM by flow cytometry. **(A)** Representative flow cytometry graphs showing the percentage of CD206+ TAMs. **(B)** The graph depicts the quantification of CD206+ TAMs analyzed in (A). **C-D.** rSlit2-N or PBS treated MVT1 tumors were processed and sectioned to immunostained with CD206-specific antibody by IHC technique. N= 5 each group.

**(C)** The representative images showing CD206+ cells in the tumor sections. **(D)** The graph depicts the quantification of CD206+ cells in sections analyzed in (C). N= 5 each group, 5 sections from each tumor.

\*\* is  $p < 0.01$ , \*\*\* is  $p < 0.001$  using student's t-test.

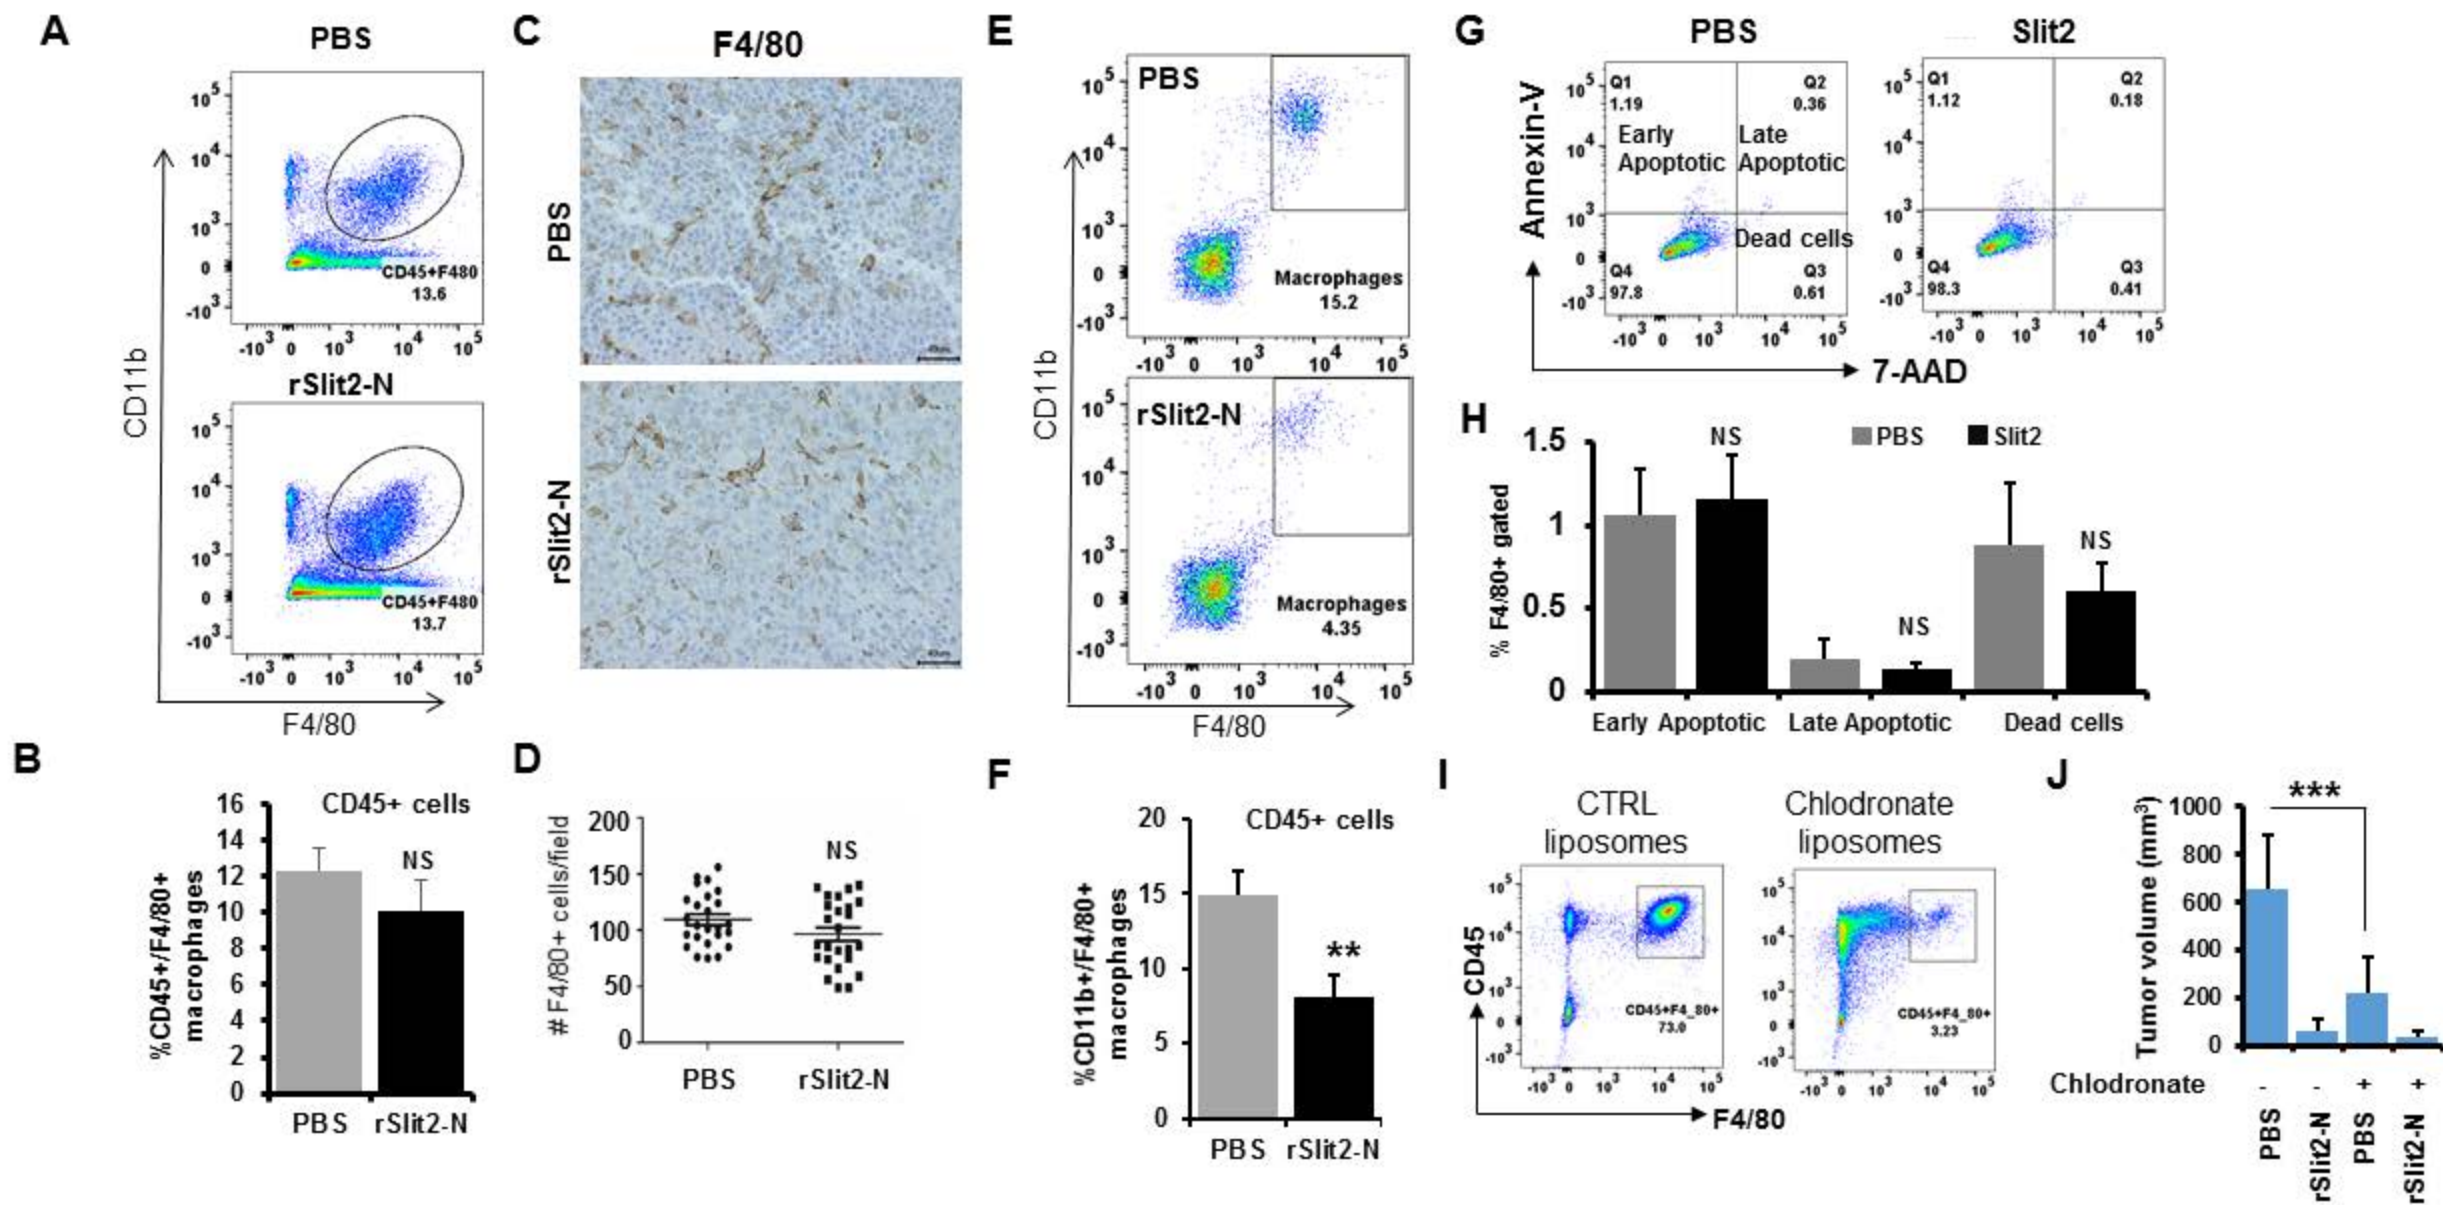

**Fig. S10. Effect of rSlit2-N on the number of macrophages recruited to the tumors and spleen.**

**A-B.** The whole tumors harvested from MMTV-PyMT mice treated with rSlit2-N or PBS were processed into single cells and flow cytometry was performed. **(A)** Representative flow cytometry graphs showing identification of CD11b<sup>+</sup>/F4/80<sup>+</sup> macrophages. **(B)** The quantification of macrophages was analyzed in (A). N= 5 each group.

**C-D.** rSlit2-N or PBS treated MMTV-PyMT tumors were processed and sectioned to immunostained with an F4/80-specific antibody to identify macrophages by the IHC technique. **(C)** The representative images showing F4/80<sup>+</sup> cells in the tumor sections. **(D)** The graph depicts the quantification of F4/80<sup>+</sup> cells in tissue sections analyzed in (C). N= 5 each group, 5 sections from each tumor.

**E-F.** The spleens harvested from MMTV-PyMT mice treated with rSlit2-N or PBS were minced and filtered into single cells and flow cytometry was performed. **(E)** The representative flow cytometry graphs showing the identification of F4/80 positive cells in the spleen samples. **(F)** The quantification of macrophages analyzed in (E). N= 5 each group.

**G-H.** MMTV-PyMT tumors were processed to sort F4/80<sup>+</sup> macrophages. The sorted cells were treated with rSlit2-N or PBS for 24 hours and analyzed for Annexin-V<sup>+</sup> early apoptotic or 7AAD<sup>+</sup> dead cells or Annexin-V and 7AAD double positive late apoptotic cells by flow cytometry. **(G)** Flow cytometry plots showing detection of early apoptotic, late apoptotic and dead cells. **(H)** Quantification of apoptotic and dead cells. No statistically significant differences were observed between any of the groups. NS is p value not significant using student's t-test.

**I-J.** MDA-MB-231 xenografts bearing mice were treated with clodronate or control liposomes in the presence or absence of rSlit2-N treatment. The animals were observed for tumor growth. **(I)** The flow cytometry graphs showing efficient deletion of peritoneal macrophages in mice treated with clodronate liposomes compared to control liposomes (CTRL). **(J)** The graph showing tumor volume at day of euthanasia.

NS is p value not significant, \*\* is p<0.01, \*\*\* is p<0.001 using student's t-test.



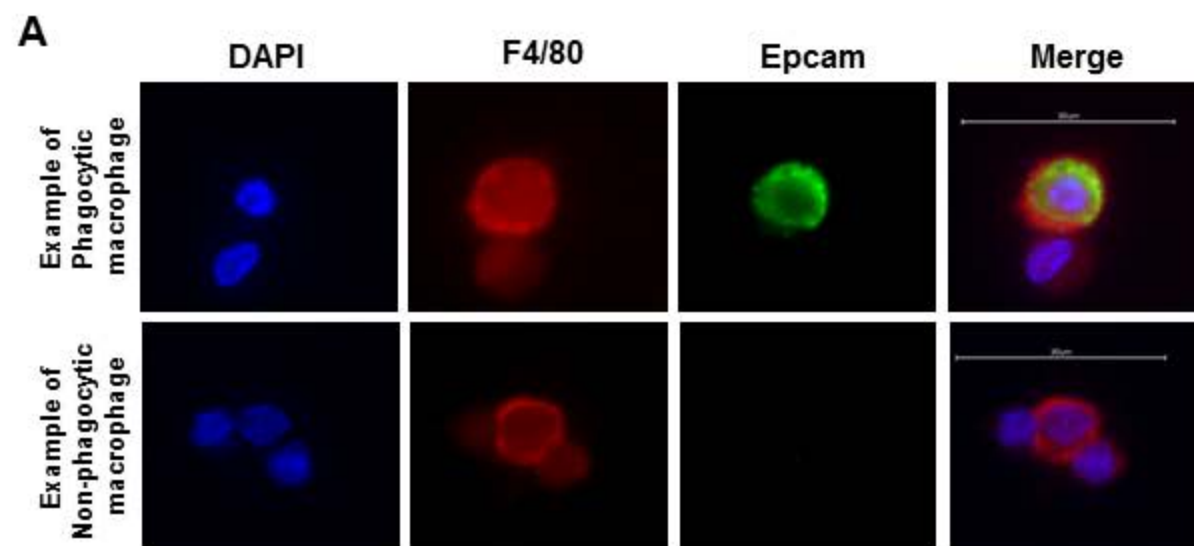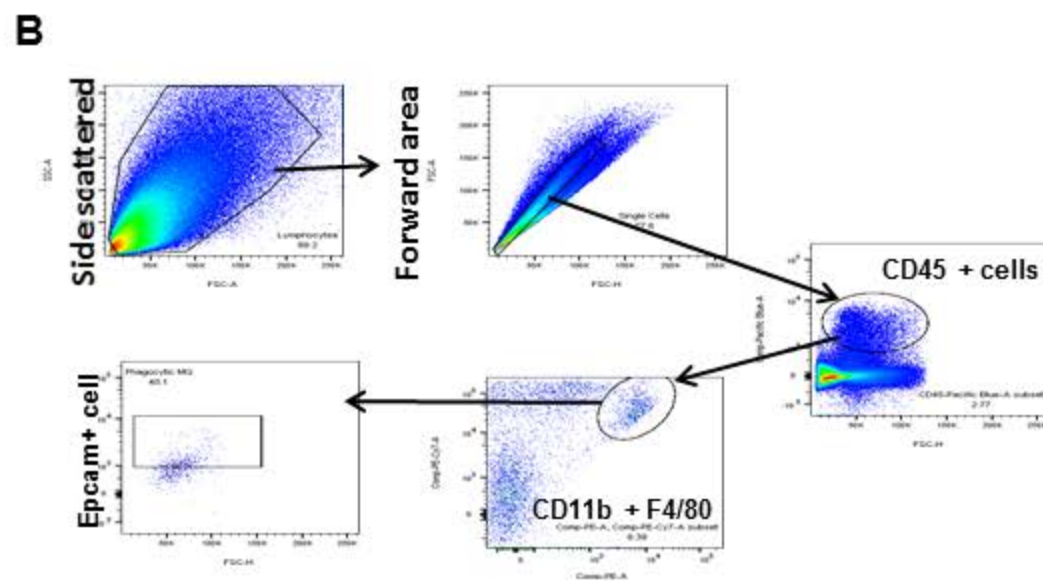

**Fig. S11. Analyze the effect of rSlit2-N on the phagocytic ability of TAMs.**

(A) MMTV-PyMT tumors were digested into single cells and CD11b+ cells were sorted. The cells were cytopun onto a glass slide and stained with F4/80 and Epcam antibodies. The slides were analyzed under a confocal microscope. The representative images showing an example of phagocytic and non-phagocytic macrophages.

(B) MMTV-PyMT mice were treated with rSlit2 or PBS. Whole tumors were digested into single cells and analyzed by flow cytometry. The cascade of flow cytometry graphs shows the gating strategy adopted to identify F4/80+ macrophages containing intracellular signal of tumor marker Epcam.

## A Brown-TAMs and Red-Cleaved caspase-3

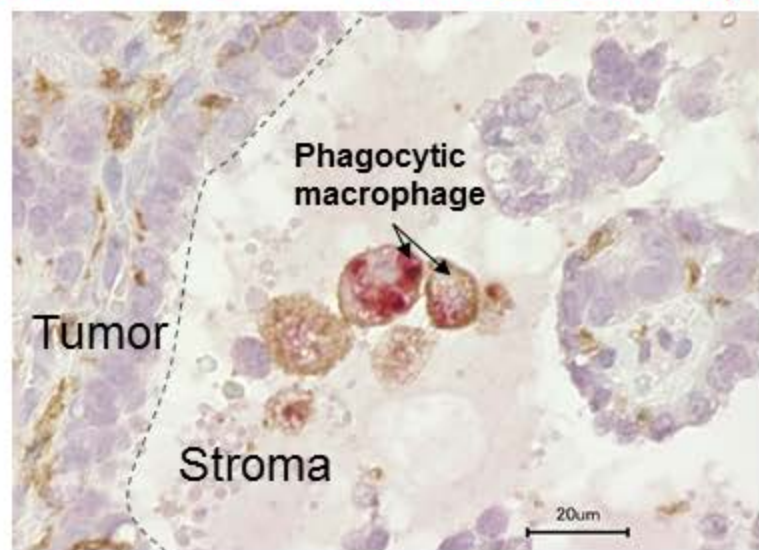

## B

rSlit2-N-T1

rSlit2-N-T2

rSlit2-N-T3

rSlit2-N-T4

rSlit2-N-T5

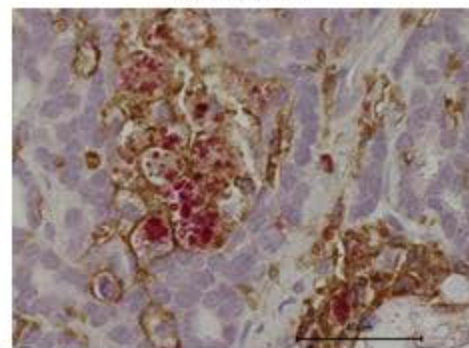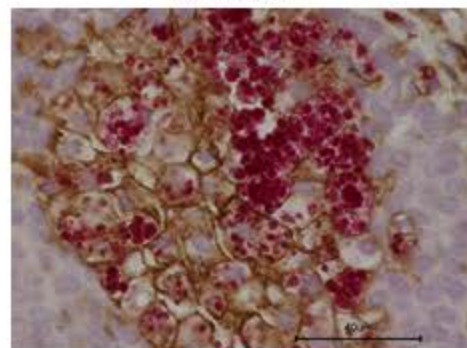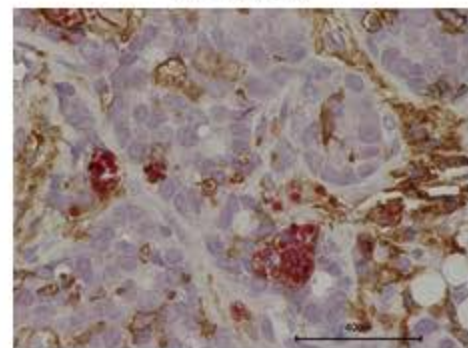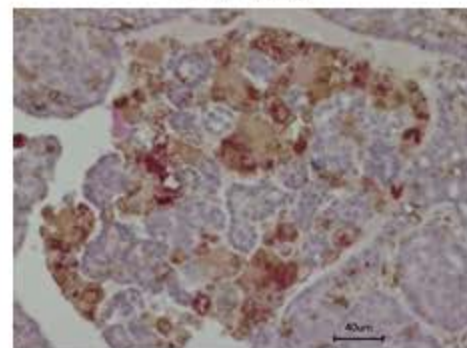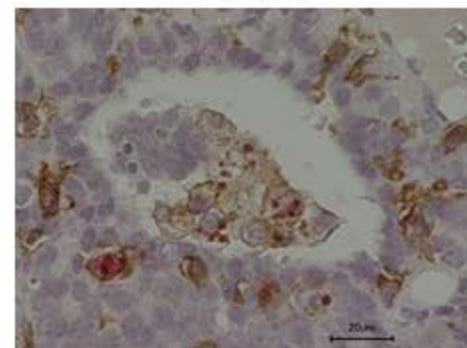

PBS-T1

PBS-T2

PBS-T3

PBS-T4

PBS-T5

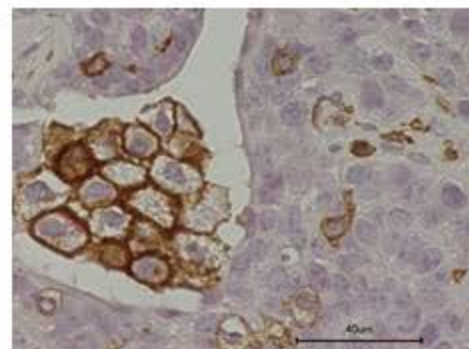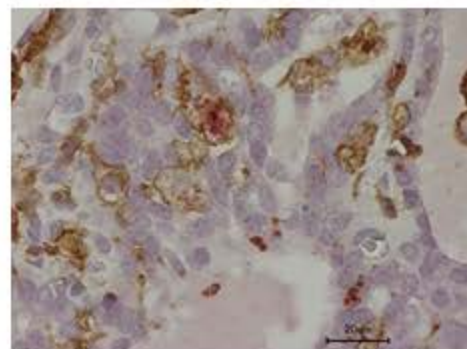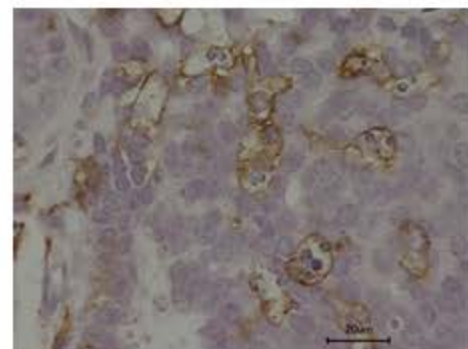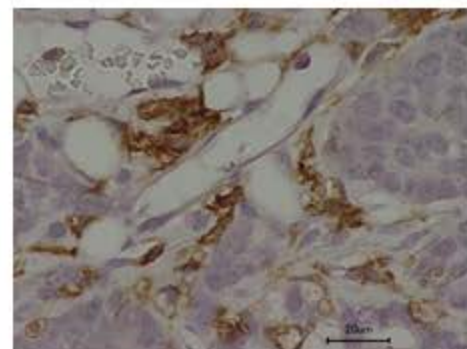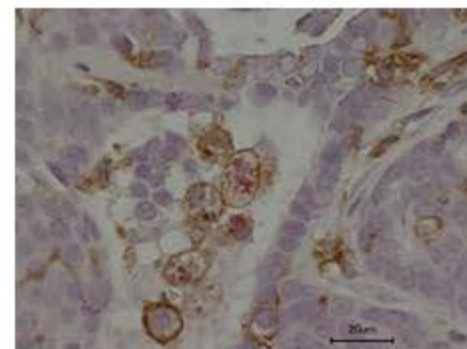

Brown-F4/80/Red-CC3

**Fig. S12. Identification of phagocytic TAMs by IHC.**

The tumors harvested from PBS or rSlit2-N treated MMTV-PyMT mice were processed and sections were immunostained with F4/80 and cleaved caspase 3 (CC3) antibodies. The primary antibodies were detected using peroxidase-DAB and alkaline phosphatase-Red chromogen substrate systems respectively.

**(A)** An example of phagocytic TAMs positive for F4/80+ and intracellular CC3.

**(B)** The representative images of 5 different tumors from each group.



Fig. S13

**A**

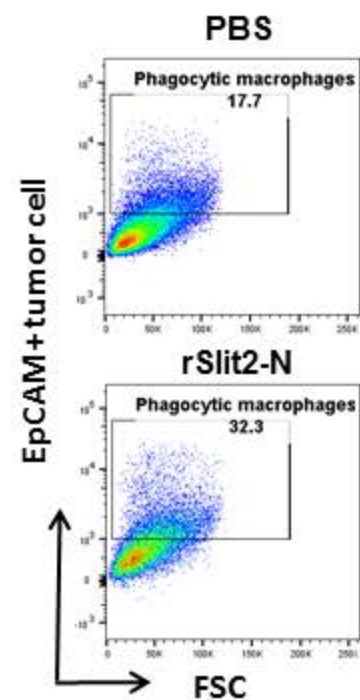

**B**

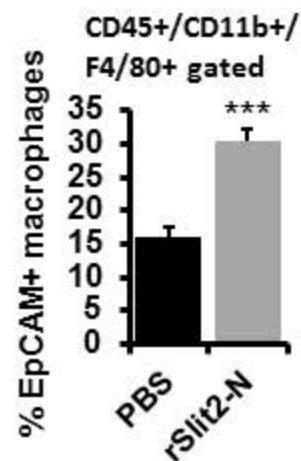

**C**

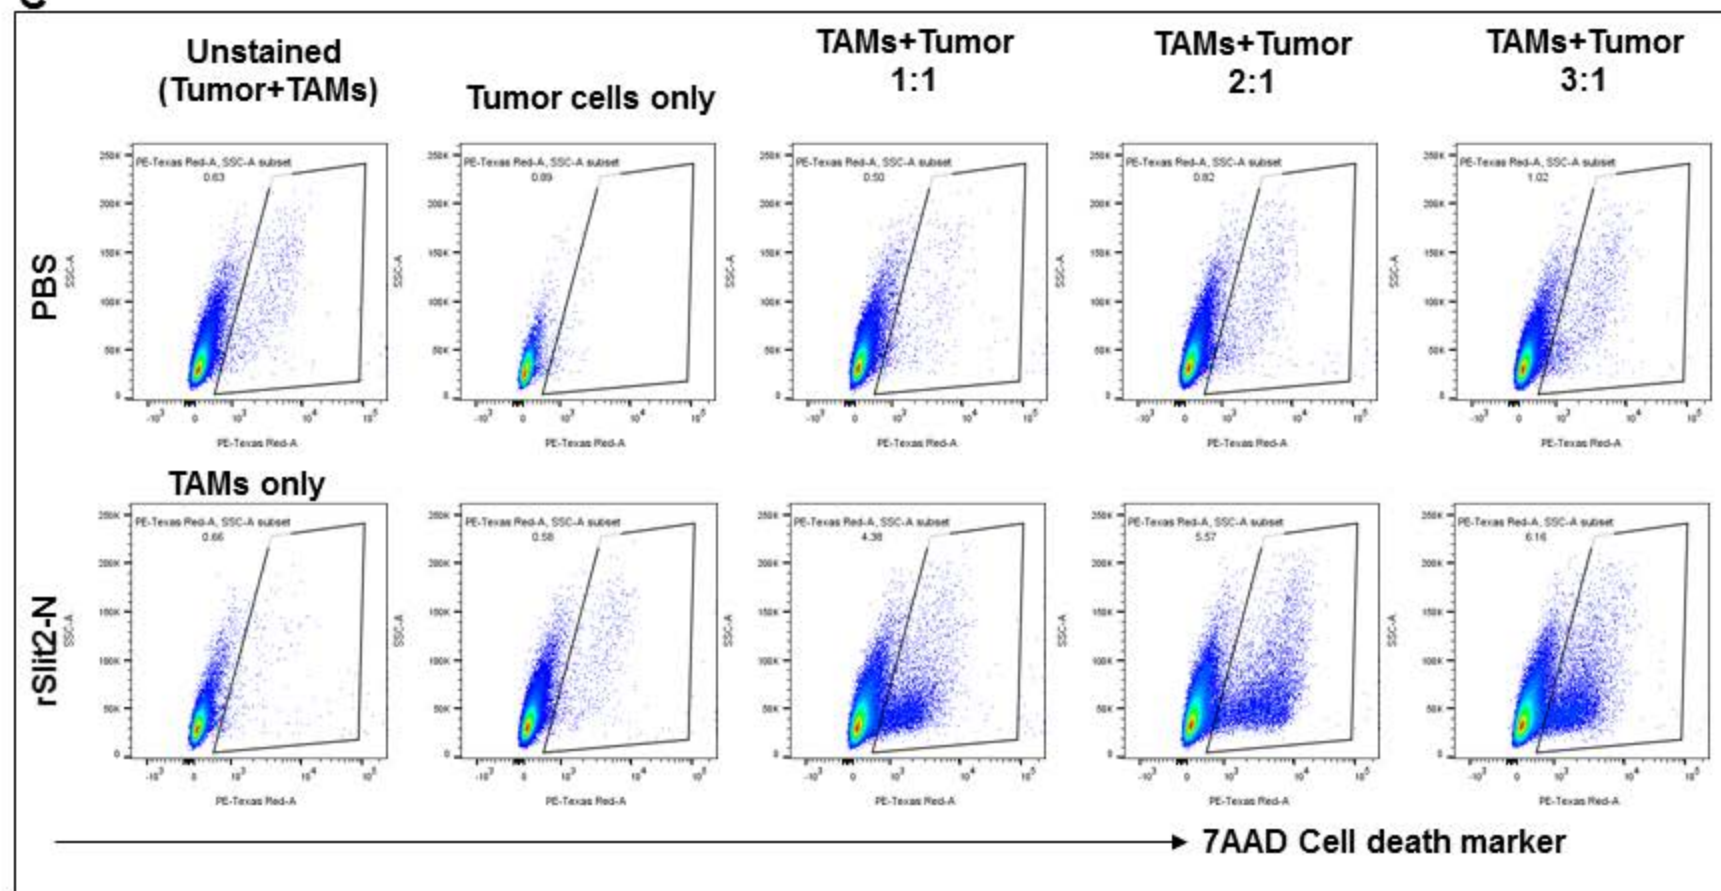

**Fig. S13. rSlit2-N enhances the ability of TAMs to lyse tumor cells *Ex-vivo*.**

**A-B.** Single-cell preparations from rSlit2-N or PBS treated MDA-MB-231 xenografts were analyzed for phagocytic macrophages using intracellular flow cytometry. **(A)** The cytometry plots are showing intracellular EpCAM signal inside CD45+/CD11b+/F4/80+ macrophages.

**(B)** The graph shows the percentage of EpCAM+ macrophages out of gated total macrophages in PBS or rSlit2-N treated tumors as identified in (A). \*\*\* is  $p < 0.001$  using student's t-test.

**(C)** The MMTV-PyMT tumors were processed into single cells and F4/80+ TAMs were sorted. The TAMs were pre-treated with rSlit2-N or PBS and MVT1 tumor cells were added to the TAMs. After 2 days, the cells were stained with cell death marker 7AAD and lysed cells were identified using flow cytometry.

Fig. S14

A

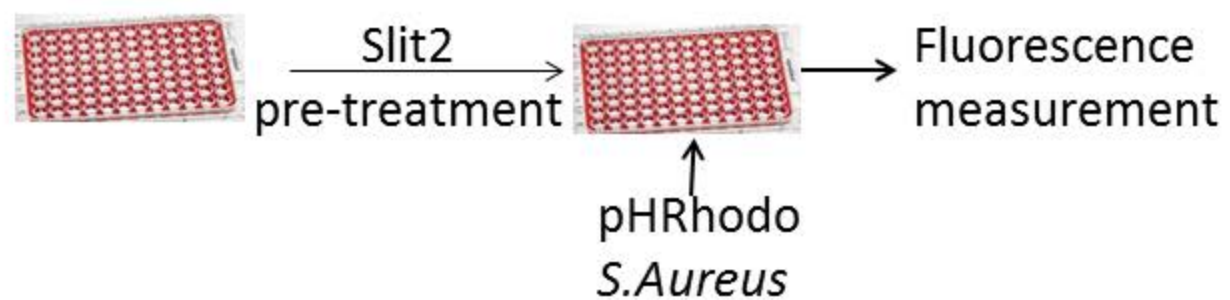

B

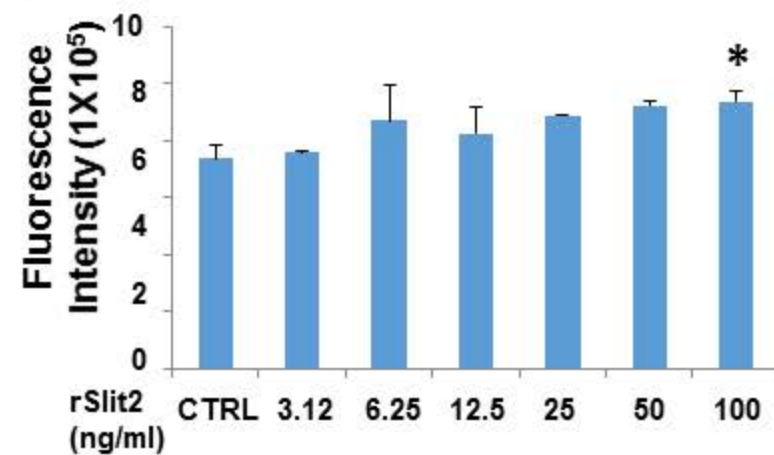

**Fig. S14. rSlit2-N enhances the phagocytic ability of RAW264.7 macrophages.**

(A) Schematic presentation of the research strategy to analyze the ability of mouse BMDMs to phagocytose pHRhodo tagged *S. Aureus* bacterial partials. The BMDMs were seeded to 96 wells in triplicates. The cells were pre-treated with rSlit2-N or PBS overnight, followed by the addition of pHRhodo tagged *S. Aureus* bacteria. The plates were incubated at 37° C in a fluorescence plate reader and kinetics of bacterial phagocytosis was analyzed for up to 4 hours.

(B) The graph represents fluorescence intensity generated by phagocytosis of bacterial particles at 3 hours and different concentrations of rSlit2-N. \* is  $p < 0.05$  using Student's t-test.

Fig. S15

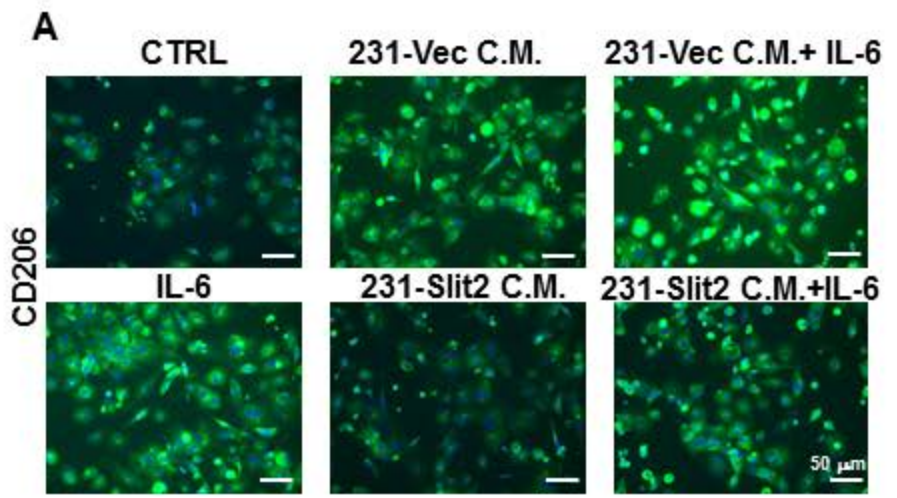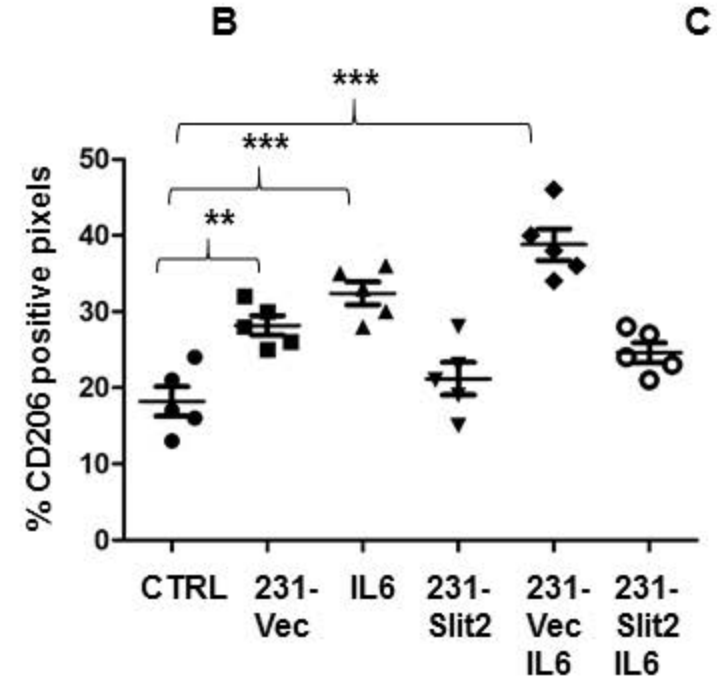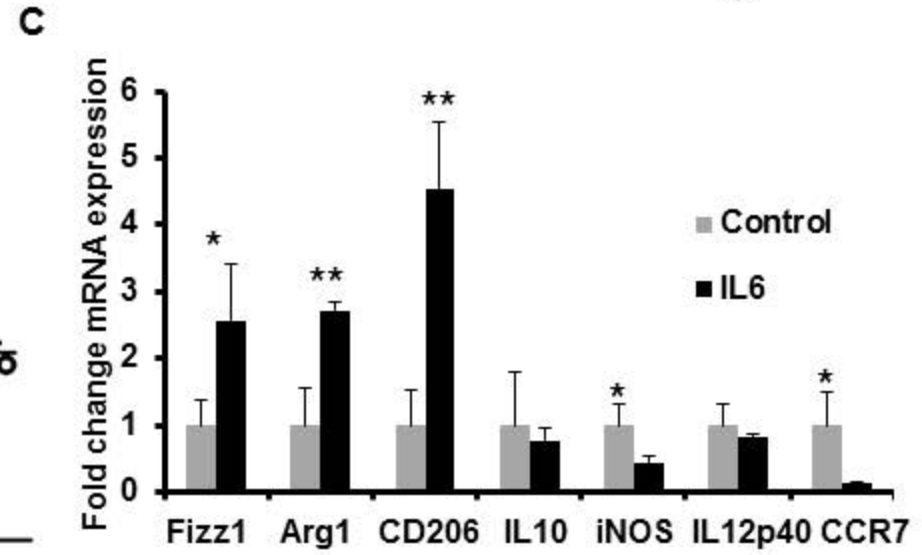

**Fig. S15. IL6 induces and Slit2 inhibits M2 macrophage markers.**

**(A)** Human monocyte cell line THP1 was induced with PMA to differentiate into macrophages. These macrophages were incubated with 231-Vec CM or 231-Slit2 CM or recombinant IL6 (10 ng/ml) for 48 hours followed by immunofluorescence staining using TAMs specific CD206 antibody. The representative images showing expression of CD206 were analyzed by a fluorescence microscope. **(B)** Quantification of CD206 expression as detected in (A).

**(C)** BMDMs were treated with recombinant mouse IL6 (10 ng/ml) for 48 hours. The cells were lysed and mRNA was harvested. The expression of various M1/M2 macrophage markers was analyzed by real-time PCR.

\* is  $p < 0.05$ , \*\* is  $p < 0.01$ , \*\*\* is  $p < 0.001$  using student's t-test.



**A** Analysis of statistical significance for figure 6C.

| Comparison          | Statistical significance |
|---------------------|--------------------------|
| Normal-vs-Luminal   | <1E-12                   |
| Normal-vs-HER2Pos   | <1E-12                   |
| Normal-vs-TNBC-BL1  | <1E-12                   |
| Normal-vs-TNBC-BL2  | 3.81570330887371E-11     |
| Normal-vs-TNBC-IM   | 1.62436730732907E-12     |
| Normal-vs-TNBC-LAR  | 1.5701000499746E-09      |
| Normal-vs-TNBC-MSL  | 9.698700E-03             |
| Normal-vs-TNBC-M    | 1.62470037423645E-12     |
| Normal-vs-TNBC-UNS  | 1.19209975224521E-10     |
| Luminal-vs-HER2Pos  | 1.27849999476126E-08     |
| Luminal-vs-TNBC-BL1 | 4.24119999997696E-06     |
| Luminal-vs-TNBC-BL2 | 4.615800E-03             |
| Luminal-vs-TNBC-IM  | 2.28729999995902E-06     |

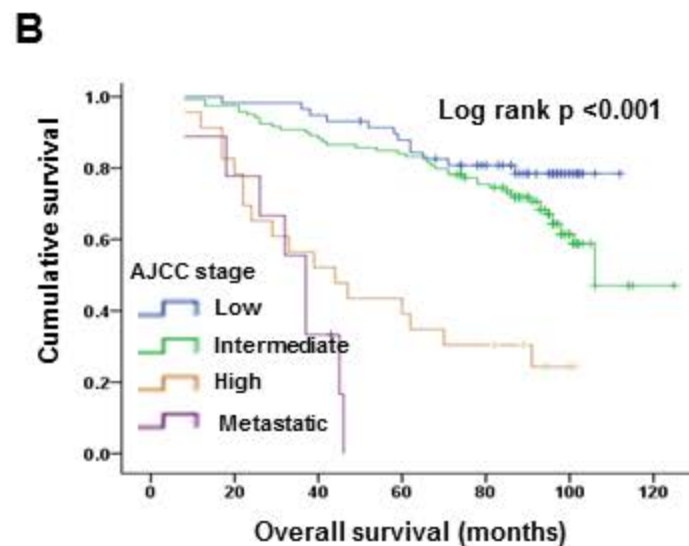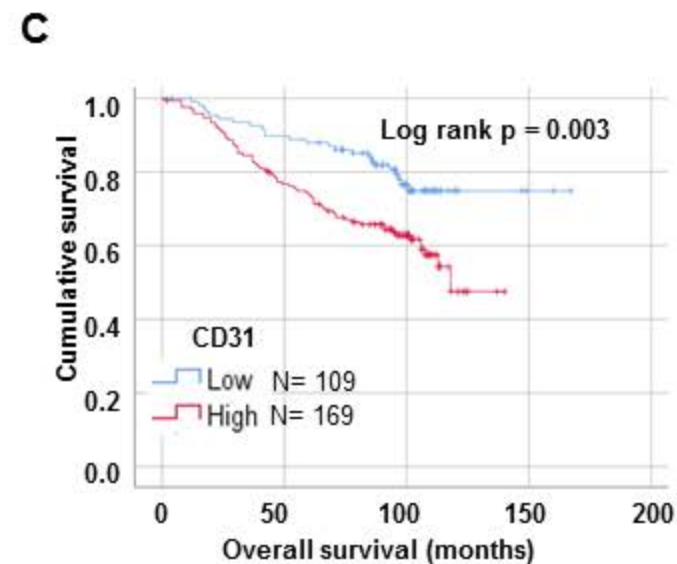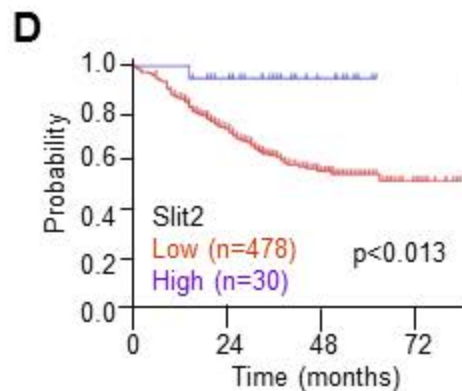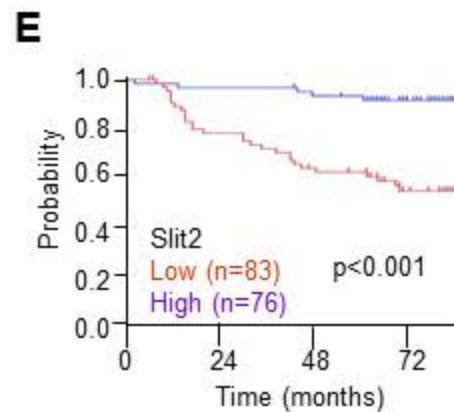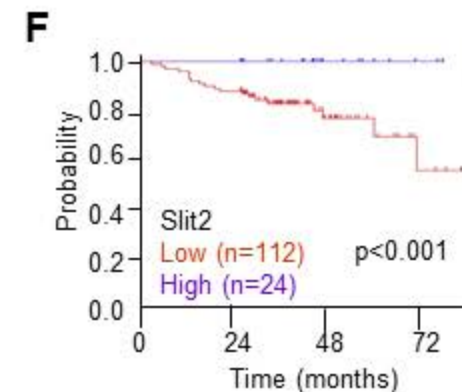

**Fig. S16. Correlation of Slit2 expression levels with breast cancer patient survival.**

**(A)** Analysis of statistical significance for Slit2 mRNA expression in human breast tissue samples presented in Fig. 6C.

**B-C.** Survival analysis of experimental TMA patients (n= 277) based on **(B)** tumor stage and **(C)** CD31+ blood vessels.

**D-F.** Slit2 expression analysis using R2 bioinformatics platform demonstrated that **(D)** high level of Slit2 correlates with better breast cancer patient survival in Booser database, n=508, **(E)** Bergh database, n=159 and **(F)** Zhang database, n=136.

Table S1. List of real time PCR primers.

| Primer     |         | Sequence (5' – 3')       |
|------------|---------|--------------------------|
| MMP13      | Forward | TGGACCTTCTGGTCTTCTGG     |
|            | Reverse | TGGGCAGCAACAATAAACA      |
| MMP10      | Forward | CAGTTGGAGAACACGGAGAC     |
|            | Reverse | TGTCCATTTCTCATCATCATCG   |
| MMP15      | Forward | CAGGAAAGGCATGGAACAAT     |
|            | Reverse | ACCAATGGTGTGACCTGCTC     |
| β-Actin    | Forward | CAGCTTCTTTGCAGCTCCTT     |
|            | Reverse | CACGATGGAGGGGAATACAG     |
| Arginase 1 | Forward | AACACGGCAGTGGCTTTAACC    |
|            | Reverse | GGTTTTCATGTGGCGCATTC     |
| Fizz1      | Forward | ACTGCCTGTGCTTACTCGTTGACT |
|            | Reverse | AAAGCTGGGTTCTCCACCTCTCA  |
| CD206      | Forward | CCACAGCATTGAGGAGTTTG     |
|            | Reverse | ACAGCTCATCATTTGGCTCA     |
| IL-10      | Forward | CGGGAAGACAATAACTG        |
|            | Reverse | CATTTCCGATAAGGCTTGG      |
| iNOS       | Forward | CCAAGCCCTCACCTACTTCC     |
|            | Reverse | CTCTGAGGGCTGACACAAGG     |
| IL-12p40   | Forward | AGTATCTCTGCCTCCTTCCTT    |
|            | Reverse | GCAAACTGAAAAGTAGTGTC     |
| CCR7       | Forward | AAAGCACAGCCTTCCTGTGT     |
|            | Reverse | AGTCCACCGTGGTATTCTCG     |
| 18s        | Forward | GCTCTAGAATTACCACAGTTATC  |
|            | Reverse | AAATCAGTTATGGTTCCTTTGGT  |

**Abbreviations:** MMP, Matrix Metalloproteinase; CD206, Cluster of Differentiation 206; IL10, Interleukin 10; iNOS, inducible Nitric Oxide Synthase; IL12p40, Interleukin 12 p40 subunit; CCR7, C-C Chemokine Receptor 7,

Table S2. List of reagents and resources.

| Reagents or resources                 | Source                    | Catalog number |
|---------------------------------------|---------------------------|----------------|
| Antibodies- Flow Cytometry            |                           |                |
| Anti-mouse CD45- Brilliant Violet 421 | Biolegend                 | 103133         |
| Anti-mouse CD11b-APC/Cy7              | Biolegend                 | 101226         |
| Anti-mouse CD11b-PE/Cy7               | Biolegend                 | 101215         |
| Anti- mouse F4/80-PE/Dazzle 594       | Biolegend                 | 123145         |
| Anti- mouse F4/80-PE                  | Biolegend                 | 123109         |
| Anti- mouse MHCII-FITC                | Biolegend                 | 123107         |
| Anti-mouse CD80-PE/Cy7                | Biolegend                 | 104733         |
| Anti- mouse CD206-PE/Cy7              | Biolegend                 | 141719         |
| Anti- mouse CD206-PE/ Dazzle 594      | Biolegend                 | 141731         |
| Anti- mouse CD3 PE/Cy7                | Biolegend                 | 100219         |
| Anti- mouse CD4-APC/Cy7               | Biolegend                 | 100413         |
| Anti- mouse CD8-PE                    | Biolegend                 | 100708         |
| Anti- mouse Epcam- FITC               | Biolegend                 | 118207         |
| Anti- mouse Robo1                     | Abcam                     | Ab7279         |
| Anti-mouse CD11b-biotin               | Biolegend                 | 101204         |
| Anti-mouse F4/80-biotin               | Biolegend                 | 123106         |
| Anti-Biotin microbeads                | Miltenyi Biotec           | 130-090-485    |
| Antibody-WB, IHC and IF               |                           |                |
| Anti-mouse Slit2                      | Sigma-Aldrich             | SAB2701356     |
| Anti-mouse Ki67                       | Invitrogen                | 14-5698-80     |
| Anti-mouse CD31                       | Cell Signaling Technology | 77699S         |
| Anti-mouse MMP13                      | Novus                     | NBP2-17310     |
| Anti-mouse CC3                        | Cell Signaling Technology | 9961           |
| Anti-mouse/human CD206                | Cell Signaling Technology | 91992          |
| Anti-Mouse F4/80                      | AbD Serotec               | MCA497G        |
| Anti-mouse Collagen 1                 | Abcam                     | ab34710        |
| Anti-mouse Epcam                      | Cell Signaling Technology | 14452          |
| Anti-mouse FAP                        | Abcam                     | Ab53066        |
| Anti-human Slit2                      | ThermoFisher              | PA5-31133      |
| Anti-human CD68                       | Dako                      | M0814          |
| Anti-human CD163                      | Bio-Rad                   | MCA1853        |
| Anti-Human CD31                       | Agilent-Dako              | GA61061-2      |
| Anti-p-NF-kB                          | Cell Signaling            | 3033S          |
| Proteins, Antibodies and Reagents     |                           |                |
| Mouse recombinant Slit2-N             | R&D Systems               | 5444-SL-050    |
| Human recombinant Slit2-N             | R&D Systems               | 8616-SL-050    |
| Recombinant mouse Interleukin-6       | PeproTech                 | 216-16         |

| <i>Table S2 continued.</i>                                   |                        |             |
|--------------------------------------------------------------|------------------------|-------------|
| Recombinant human Interleukin-6                              | PeproTech              | 200-06      |
| Interleukin 6 neutralization antibody                        | BioXCell               | BE0046      |
| Goat anti-rat secondary antibody, Alexa Flour 680            |                        | A-21096     |
| Goat anti-rabbit secondary antibody, Alexa Flour 488         | Invitrogen             | A32731      |
| Goat anti-mouse secondary antibody, Alexa Flour 488          | Invitrogen             | A32723      |
| Alexa-flour 555-labelled Dextran                             | ThermoFisher           | D34679      |
| Hyaluronic acid                                              | Millipore Inc.         | 385911      |
| Periostin                                                    | R&D Systems            | MAB3548     |
| Tenascin C                                                   | Abcam                  | Ab203395    |
| Reagents or resources                                        |                        |             |
| Alexa-flour 680-labelled Dextran                             | ThermoFisher           | D34680      |
| Fc receptor blocker                                          | ThermoFisher           | 14-0161-82  |
| Fixation/ permeabilization Diluent                           | Invitrogen             | 5223-56     |
| permeabilization buffer                                      | Invitrogen             | 0C-8333-56  |
| Type 1 Collagen- Rat tail                                    | BD Biosciences         | 354236      |
| MACS LS column                                               | Miltenyibiotec         | 130-042-401 |
| MACS magnet                                                  | Miltenyibiotec         | 130-042-302 |
| Macrophage depletion kit                                     | Encapsula NanoSciences | CLD-8901    |
| Trizol                                                       | Invitrogen             |             |
| VECTASHIELD® HardSet™ Antifade Mounting Medium with DAPI     | Vector Laboratories    | H-1500      |
| BLOXALL Blocking Solution                                    | Vector Laboratories    | SP-6000     |
| 7AAD                                                         | BD Biosciences         | 559925      |
| Phorbol-12-myristate-13-acetate (PMA)                        | Sigma Aldrich          | 16561-29-8  |
| pH-Rhodo Green S. aureus Bioparticles                        | Invitrogen             | P35367      |
| Live cell imaging media                                      | Invitrogen             | A14291DJ    |
| VectaMount mounting media                                    | Vector Laboratories    | H-5000      |
| ProLong Gold media with DAPI                                 | Invitrogen             | P36941      |
| MMP13 inhibitor (WAY 170523)                                 | Tocris                 | 2633        |
| Commercial assays                                            |                        |             |
| RNAEasy Microkit                                             | Qiagen                 | 74004       |
| Cytokine Array                                               | Ray Biotech            |             |
| ImmPRESS Goat Anti-Mouse IgG Polymer Kit, Peroxidase         | Vector Laboratories    | MP-7452     |
| ImmPRESS Goat Anti-Rabbit IgG Polymer Kit, Peroxidase        | Vector Laboratories    | MP-7451     |
| ImmPRESS Goat Anti-Rat IgG Polymer Kit, Alkaline Phosphatase | Vector Laboratories    | MP-5404     |
| ImmPACT DAB Substrate Kit, Peroxidase                        | Vector Laboratories    | SK-4105     |

|                                                 |                     |         |
|-------------------------------------------------|---------------------|---------|
| <i>Table S2 continued.</i>                      |                     |         |
| ImmPACT Red Substrate Kit, Alkaline Phosphatase | Vector Laboratories | SK-5105 |

Abbreviation: WB, Western Blot; IHC, Immunohistochemistry; IF, Immunofluorescence; CC3, Cleaved Caspase 3; MMP, Matrix Metalloproteinase; FAP, Fibroblast Activating Protein



Table S3. Differentially expressed genes in the CD11b+ TAMs sorted from rSlit2-N treated MMTV-PyMT tumors compared to PBS treatment.

| Gene name | Fold change | Adj. p value |
|-----------|-------------|--------------|
| IL6       | -4.68       | 0.00301      |
| EMP1      | -2.83       | 0.00301      |
| CCL4      | -3.22       | 0.00301      |
| Terf2ip   | -1.1        | 0.00531      |
| Selp      | -4.62       | 0.00531      |
| Ifnb1     | -4.9        | 0.00531      |
| Adams1    | -2.8        | 0.00531      |
| Ptx3      | -2.34       | 0.00531      |
| Thbd      | -3.44       | 0.00531      |
| Lamb3     | -2.18       | 0.00531      |
| Tnf       | -2.81       | 0.00531      |
| Gem       | -4.13       | 0.00531      |
| Pde4a     | -2.57       | 0.00531      |
| Cxcl2     | -1.64       | 0.00531      |
| Cxcl12    | -2.92       | 0.00531      |
| Col3a1    | -3.82       | 0.00531      |
| Irf1      | -2.35       | 0.00531      |
| Csf3      | -3.98       | 0.00531      |
| Cdkn1a    | -1.3        | 0.00531      |

Table S4. The association of Slit2 expression with different prognostic markers in breast cancer tissues using breast cancer patient TMA (n=350).

|              |          | Slit2 (%)     |               |              | P value |
|--------------|----------|---------------|---------------|--------------|---------|
|              |          | Negative      | Low           | High         |         |
| <b>Stage</b> | 1        | 47<br>(42.7)  | 46<br>(41.8)  | 17<br>(15.5) | 0.624   |
|              | 2        | 83<br>(48.3)  | 68<br>(39.5)  | 21<br>(12.2) |         |
|              | 3        | 22<br>(46.8)  | 21<br>(44.7)  | 4<br>(8.5)   |         |
|              | 4        | 12<br>(63.2)  | 6<br>(31.6)   | 1<br>(5.3)   |         |
| <b>Grade</b> | Low      | 10<br>(35.7)  | 10<br>(35.7)  | 8<br>(28.6)  | 0.015   |
|              | Medium   | 66<br>(42.3)  | 71<br>(45.5)  | 19<br>(12.2) |         |
|              | High     | 79<br>(53.4)  | 57<br>(38.5)  | 12<br>(8.1)  |         |
| <b>ER</b>    | Absent   | 51<br>(60.7)  | 28<br>(33.3)  | 5 (6)        | 0.009   |
|              | Present  | 114 (43)      | 114<br>(43)   | 38<br>(14)   |         |
| <b>PR</b>    | Absent   | 63<br>(55.8)  | 41<br>(36.3)  | 9 (8)        | 0.039   |
|              | Present  | 99<br>(42.3)  | 101<br>(43.2) | 34<br>(14.5) |         |
| <b>Her2</b>  | Negative | 80<br>(48.2)  | 68<br>(41)    | 18<br>(10.8) | 0.895   |
|              | Low      | 9 (52.9)      | 5<br>(29.4)   | 3<br>(17.6)  |         |
|              | Medium   | 17<br>(51.5)  | 11<br>(33.3)  | 5<br>(15.2)  |         |
|              | High     | 23<br>(52.3)  | 17<br>(38.6)  | 4<br>(9.1)   |         |
| <b>TNBC</b>  | Yes      | 20<br>(74.1)  | 6<br>(22.2)   | 1<br>(3.7)   | 0.025   |
|              | No       | 114<br>(46.9) | 97<br>(39.9)  | 32<br>(13.2) |         |

Abbreviation: ER, estrogen receptor; PR, progesterone receptor; Her2, human epidermal growth factor receptor 2; TNBC, triple negative breast cancer

Table 5. Correlation of Slit2 expression with various prognostic molecular markers.

|                           |          | Negative  | Slit2 (%) |           | p   |
|---------------------------|----------|-----------|-----------|-----------|-----|
|                           |          |           | Low       | High      |     |
| <b>Trichrome</b>          | Negative | 0 (0)     | 2 (100)   | 0 (0)     | *** |
|                           | Low      | 2 (5.9)   | 13 (38.2) | 19 (55.9) |     |
|                           | Medium   | 7 (25.9)  | 17 (63)   | 3 (11.1)  |     |
|                           | High     | 17 (44.7) | 21 (55.3) | 0 (0)     |     |
| <b>CD68+ Macrophage</b>   | Negative | 45 (33.8) | 69 (51.9) | 19 (14.3) | NS  |
|                           | Low      | 54 (41.9) | 59 (45.7) | 16 (12.4) |     |
|                           | High     | 36 (53.7) | 21 (31.3) | 10 (14.9) |     |
| <b>CD163 M2-TAMs</b>      | Negative | 43 (33.9) | 54 (42.5) | 30 (23.6) | *** |
|                           | Low      | 29 (33.3) | 47 (54)   | 11 (12.7) |     |
|                           | High     | 59 (55.1) | 45 (42.1) | 3 (2.8)   |     |
| <b>CD31+ Angiogenesis</b> | Low      | 32 (29.6) | 57 (52.8) | 19 (17.6) | *   |
|                           | High     | 80 (46.5) | 74 (43)   | 18 (10.5) |     |

Note: \* is p value <0.05; \*\*\* is p value <0.001, NS is P value not significant using student's t-test.
